1 IRG1 and iNOS act redundantly with other interferon gamma-induced factors to restrict  
2 intracellular replication of *Legionella pneumophila*.

3

4 Jordan V. Price<sup>a#</sup>, Daniel Russo<sup>a</sup>, Daisy X. Ji<sup>b</sup>, Roberto Chavez<sup>b</sup>, Lucian DiPeso<sup>b</sup>,  
5 Angus Yiu-Fai Lee<sup>c</sup>, Jörn Coers<sup>d</sup>, and Russell E. Vance<sup>b,c,e#</sup>

6

7 Department of Biology, Oberlin College, Oberlin, Ohio, USA<sup>a</sup>; Division of Immunology &  
8 Pathogenesis, Department of Molecular & Cell Biology, University of California,  
9 Berkeley, California, USA<sup>b</sup>; Cancer Research Laboratory, University of California,  
10 Berkeley, California, USA<sup>c</sup>; Department of Molecular Genetics and Microbiology, Duke  
11 University Medical Center, Durham, North Carolina, USA<sup>d</sup>; Howard Hughes Medical  
12 Institute, University of California, Berkeley, California, USA<sup>e</sup>.

13

14 Running head: Interferon gamma bacterial restriction

15

16 #Address correspondence to Jordan V. Price, [jprice@oberlin.edu](mailto:jprice@oberlin.edu) and Russell E. Vance,

17 [rvance@berkeley.edu](mailto:rvance@berkeley.edu)

18 **Abstract**

19 Interferon gamma (IFN $\gamma$ ) restricts the intracellular replication of many pathogens, but  
20 how IFN $\gamma$  confers cell-intrinsic pathogen resistance remains unclear. For example,  
21 intracellular replication of the bacterial pathogen *Legionella pneumophila* in  
22 macrophages is potently curtailed by IFN $\gamma$ , but consistent with prior results, no  
23 individual genetic deficiency we tested compromised IFN $\gamma$ -mediated control.  
24 Intriguingly, however, we observed that the glycolysis inhibitor 2-deoxyglucose (2DG)  
25 partially rescued *L. pneumophila* replication in IFN $\gamma$ -treated macrophages. 2DG inhibits  
26 glycolysis and triggers the unfolded protein response, but unexpectedly, it appears  
27 these effects are not responsible for perturbing the antimicrobial activity of IFN $\gamma$ .  
28 Instead, we found that 2DG rescues bacterial replication predominantly by inhibiting the  
29 induction of two key antimicrobial factors, inducible nitric oxide synthase (iNOS) and  
30 immune responsive gene 1 (IRG1). Using immortalized and primary macrophages  
31 deficient in iNOS and IRG1, we confirm that loss of both iNOS and IRG1, but not  
32 individual deficiency in each gene, partially reduces IFN $\gamma$ -mediated restriction of *L.*  
33 *pneumophila*. Further, using a combinatorial CRISPR/Cas9 mutagenesis approach, we  
34 find that mutation of iNOS and IRG1 in combination with four other genes (CASP11,  
35 IRGM1, IRGM3 and NOX2) results in a total loss of *L. pneumophila* restriction by IFN $\gamma$   
36 in primary bone marrow macrophages. There are few, if any, other examples in which  
37 the complete set of cell-intrinsic factors required for IFN $\gamma$ -mediated restriction of an  
38 intracellular bacterial pathogen have been genetically identified. Our results highlight the  
39 combinatorial strategy used by hosts to block the exploitation of macrophages by  
40 pathogens.

41 **Importance**

42 *Legionella pneumophila* is one example among many species of pathogenic bacteria  
43 that replicate within mammalian macrophages during infection. The immune signaling  
44 factor interferon gamma (IFN $\gamma$ ) blocks *L. pneumophila* replication in macrophages and  
45 is an essential component of the immune response to *L. pneumophila* and other  
46 intracellular pathogens. However, to date, no study has determined the exact molecular  
47 factors induced by IFN $\gamma$  that are required for its activity. We generated macrophages  
48 lacking different combinations of IFN $\gamma$ -induced genes in an attempt to find a genetic  
49 background in which there is a complete loss of IFN $\gamma$ -mediated restriction of *L.*  
50 *pneumophila*. We successfully identified six genes that comprise the totality of the IFN $\gamma$ -  
51 dependent restriction of *L. pneumophila* replication in macrophages. Our results clarify  
52 the molecular basis underlying the potent effects of IFN $\gamma$  and highlight how redundancy  
53 downstream of IFN $\gamma$  is key to prevent exploitation of the macrophage niche by  
54 pathogens.

## 55 **Introduction**

56 Macrophages are preferred host cells for many species of intracellular bacterial  
57 pathogen. *Bona fide* pathogens of mammals, such as *Mycobacterium tuberculosis*  
58 (*Mtb*), *Listeria monocytogenes*, and *Salmonella enterica*, as well as environmental  
59 microorganisms that are “accidental” pathogens of mammals, such as *L. pneumophila*,  
60 display the ability to replicate efficiently in macrophages, demonstrating that these cells  
61 can provide a plastic niche suitable to the metabolic needs of distinct bacterial species  
62 (1). To defend against potential exploitation by diverse pathogens, including  
63 environmental microorganisms with which they have not co-evolved, macrophages  
64 require potent mechanisms to restrict intracellular bacterial replication. A cornerstone of  
65 the immune response to many intracellular pathogens is the cytokine interferon gamma  
66 (IFN $\gamma$ ). The importance of IFN $\gamma$  is highlighted by the observation that genetic  
67 deficiencies in the IFN $\gamma$  signaling pathway render humans highly susceptible to  
68 infections by intracellular pathogens, most notably *Mtb* and even normally benign  
69 environmental bacteria (2). Mice engineered to be deficient in the IFN $\gamma$  pathway are  
70 also highly susceptible to intracellular bacterial pathogens, including *Mtb*, *L.*  
71 *monocytogenes*, *S. enterica*, *Brucella abortus*, and *L. pneumophila*, among others (3-9).  
72 Brown *et al* demonstrated that failure of IFN $\gamma$ -deficient mice to control *L. pneumophila*  
73 likely occurs at the level of cell-intrinsic restriction of bacteria in monocyte-derived  
74 macrophages that infiltrate the lung following infection (10). Accordingly, *in vitro*  
75 infection models using bone marrow-derived macrophages (BMMs) have enabled  
76 meaningful study of the cell-intrinsic immune response to *L. pneumophila* coordinated  
77 by IFN $\gamma$ . However, despite several decades of evidence supporting an essential role for

78 IFN $\gamma$  in the antimicrobial immune response, the precise mechanisms by which IFN $\gamma$  acts  
79 to mediate cell-intrinsic control of *L. pneumophila* and other pathogens remain obscure.

80 Inducible nitric oxide synthase (iNOS, encoded by the gene *Nos2* in mice) plays  
81 a key role in the IFN $\gamma$ -dependent response to *Mtb* and several other pathogens (11-13).  
82 iNOS facilitates the production of nitric oxide (NO), a toxic metabolite with direct  
83 antimicrobial activity. NO also acts as a regulator of host responses and coordinates  
84 metabolic changes in IFN $\gamma$ -stimulated macrophages (14-16). While *Nos2*<sup>-/-</sup> mice  
85 display increased susceptibility to infection by *Mtb*, it appears this is not simply due to  
86 direct cell-intrinsic antimicrobial effects of NO (17). In addition, the activity of iNOS is not  
87 absolutely required to control infection by many pathogens, suggesting that there are  
88 redundant iNOS-independent mechanisms that underlie the potency of IFN $\gamma$  (18).  
89 Strikingly, while *L. pneumophila* does not display resistance to the effects of NO in  
90 broth, *Nos2*<sup>-/-</sup> macrophages are not impaired in IFN $\gamma$ -dependent restriction of *L.*  
91 *pneumophila* (19-21). This indicates either that *L. pneumophila* is resistant to the effects  
92 of iNOS/NO during infection or, more likely, that there are redundant factors induced by  
93 IFN $\gamma$  that can restrict *L. pneumophila* in the absence of iNOS.

94 Previous work has attempted to address the possibility of redundancy in the  
95 IFN $\gamma$ -dependent immune response to *L. pneumophila*. Pilla *et al* generated quadruple  
96 knockout (QKO) mice deficient in *Nos2*, *Cybb* (cytochrome b(558) subunit beta,  
97 encoding NADPH oxidase 2 aka NOX2), *Irgm1* (immunity-related GTPase family M  
98 member 1), and *Irgm3* (immunity-related GTPase family M member 3), all induced by  
99 IFN $\gamma$  (20). NOX2 partners with phagosomal oxidase components to generate reactive  
100 oxygen species, which, like NO, can cause direct toxicity to phagocytized pathogens in

101 neutrophils and macrophages (22, 23). IRGM1 and IRGM3 are antimicrobial GTPases  
102 that may participate in the disruption of membrane-bound, pathogen-containing  
103 compartments within phagocytes (20, 24). Remarkably, Pilla *et al* observed that  
104 macrophages derived from QKO mice retained potent restriction of *L. pneumophila*  
105 replication when stimulated with IFN $\gamma$ , and further implicated the bacterial  
106 lipopolysaccharide detector caspase 11 (CASP11), which when activated can trigger  
107 host macrophage pyroptosis, in some of the residual IFN $\gamma$ -dependent restriction of *L.*  
108 *pneumophila* replication in macrophages (20).

109         Recently, Naujoks *et al* implicated immune responsive gene 1 (IRG1, encoded by  
110 the gene *Acod1*) in the IFN $\gamma$ -dependent immune response to *L. pneumophila*,  
111 demonstrating that driving *Acod1* expression in macrophages was sufficient to suppress  
112 *L. pneumophila* replication (21). However, the study did not address whether  
113 macrophages deficient in IRG1 were impaired in the ability to restrict *L. pneumophila*  
114 when stimulated with IFN $\gamma$ . Like iNOS, IRG1 also generates a potentially toxic  
115 metabolite (itaconate), and contributes to metabolic changes that occur in inflamed  
116 macrophages (25-27).

117         *L. pneumophila* normally replicates in protozoan host amoebae, but can cause a  
118 severe pneumonia in humans, known as Legionnaires' disease, through infection of  
119 lung macrophages. *L. pneumophila* employs a type-IV secretion system to translocate  
120 bacterial effector proteins into the host cytosol, allowing the bacteria to establish an  
121 intracellular replicative compartment (28). Flagellin produced by wild-type *L.*  
122 *pneumophila* can trigger host cell pyroptosis via the NAIP/NLRC4 inflammasome;  
123 however, *L. pneumophila* that lack flagellin ( $\Delta$ *flaA*) are able to replicate to high levels in

124 macrophages (29-35). We recently described a mutant strain of *L. pneumophila*  
125 ( $\Delta flaA\Delta uhpC$ ) that is able to replicate in macrophages treated with 2-deoxyglucose  
126 (2DG), an inhibitor of mammalian glycolysis (36). This strain allows us to probe the role  
127 that host cell metabolism plays in the immune response to *L. pneumophila*.

128 In the present study, we use a combination of pre-existing knockout mouse  
129 models, pharmacological treatment with 2DG and other drugs, CRISPR/Cas9 genetic  
130 manipulation of immortalized mouse macrophages, and BMMs from novel strains of  
131 CRISPR/Cas9-engineered mice to survey of the factors required for IFN $\gamma$ -dependent  
132 restriction of *L. pneumophila* in macrophages. Ultimately, we demonstrate that iNOS  
133 and IRG1 are sufficient and redundant in terms of IFN $\gamma$ -dependent restriction of *L.*  
134 *pneumophila*. Further, we identify six IFN $\gamma$ -inducible factors: iNOS, IRG1, CASP11,  
135 NOX2, IRGM1, and IRGM3, which are responsible for the entirety of the IFN $\gamma$ -  
136 dependent restriction of *L. pneumophila* in macrophages.

137

## 138 **Results**

139

### 140 **IFN $\gamma$ restricts *L. pneumophila* replication across a spectrum of antimicrobial**

141 **gene-deficient macrophages.** In an attempt to identify specific factors that explain the  
142 ability of IFN $\gamma$  to restrict *L. pneumophila* replication in macrophages to specific genetic  
143 factors associated with the immune response, we tested the ability of IFN $\gamma$  to restrict *L.*  
144 *pneumophila* in BMMs derived from various knockout mice. Using an extensively  
145 validated strain of  $\Delta flaA$  *L. pneumophila* that expresses luminescence (lux) genes from  
146 *P. luminescens* (20, 36-38), we confirmed that  $\Delta flaA$  *L. pneumophila* replicates in

147 unstimulated BMMs but does not replicate in BMMs stimulated with IFN $\gamma$  (**Figure 1A**).

148 As expected, BMMs lacking the IFN $\gamma$  receptor (*Ifngr*<sup>-/-</sup>) do not restrict *L. pneumophila*

149 replication in the presence of IFN $\gamma$  (**Figure 1B**). We confirmed that BMMs lacking

150 functional iNOS (*Nos2*<sup>-/-</sup>) retain IFN $\gamma$ -dependent restriction of *L. pneumophila* (**Figure**

151 **1B**) (19-21). BMMs lacking MYD88 (*Myd88*<sup>-/-</sup>), a key adaptor in the innate inflammatory

152 immune response triggered by bacterial pattern recognition, and BMMs lacking MYD88,

153 NOD1, and NOD2 (*Myd88*<sup>-/-</sup> *Nod1*<sup>-/-</sup> *Nod2*<sup>-/-</sup>), which do not activate inflammatory NF-

154  $\kappa$ B signaling in response to *L. pneumophila* (39), still restricted bacterial replication

155 when stimulated with IFN $\gamma$  (**Figure 1C**). Consistent with previous results (20), BMMs

156 deficient in ATG5 (LysMCre<sup>+</sup> *Atg5*<sup>fl/fl</sup>), a factor essential for autophagy (40), also

157 mediate IFN $\gamma$ -dependent restriction of *L. pneumophila* replication (**Figure 1D**). Pilla *et al*

158 reported that guanylate binding proteins (GBPs) in conjunction with caspase-11

159 (CASP11) partially mediate IFN $\gamma$ -mediated restriction of *L. pneumophila* in BMMs (20).

160 We observed that BMMs from mice that lack a region of chromosome 3 containing five

161 GBPs (GBP1, 2, 3, 5, and 7, *Gbp*<sup>chr3 -/-</sup>) and also BMMs that lack functional

162 caspase-1 and CASP11 (*Casp1/11*<sup>-/-</sup>) largely retain the ability to restrict *L. pneumophila*

163 in the presence of IFN $\gamma$  (**Figure 1E**). Additionally, we observed that BMMs derived from

164 mice lacking functional MYD88 and TRIF (*Myd88*<sup>-/-</sup> *Trif*<sup>-/-</sup>), STING (*Goldenticket*) (41),

165 IFNAR (*Ifnar*<sup>-/-</sup>), and TNF receptor (*Tnfr*<sup>-/-</sup>) all retained IFN $\gamma$ -dependent restriction of *L.*

166 *pneumophila* replication (data not shown). In sum, these data confirm that no single

167 genetic factor studied to date is required to restrict *L. pneumophila* replication in

168 macrophages stimulated with IFN $\gamma$ .



169 **2-deoxyglucose partially reverses IFN $\gamma$ -dependent restriction of *L. pneumophila***  
170 **in BMMs.** We next investigated the possibility that IFN $\gamma$  may act to restrict *L.*  
171 *pneumophila* not through induction of any single antimicrobial factor but by changing the  
172 metabolic landscape of the host macrophage to be unsuitable for the metabolic needs  
173 of *L. pneumophila*. As macrophages infected with *L. pneumophila* and IFN $\gamma$ -stimulated  
174 macrophages increase rates of glycolysis (1, 36, 42), we tested whether treatment with  
175 the glycolysis inhibitor 2-deoxyglucose (2DG) might interfere with IFN $\gamma$ -dependent  
176 restriction observed in BMMs. 2DG is metabolized to 2DG-phosphate in cells, which is  
177 directly antimicrobial (36). However, by taking advantage of a newly identified strain of  
178 *L. pneumophila* resistant to the direct antimicrobial effect of 2DG(P) in BMMs  
179 ( $\Delta$ *f1aA* $\Delta$ *uhpC* *L. pneumophila*) (36), we observed that addition of 2DG to BMMs partially  
180 restored *L. pneumophila* replication in IFN $\gamma$ -treated macrophages (**Figure 2A**). We  
181 confirmed that 2DG disrupts the enhanced glycolysis observed in *L. pneumophila*-  
182 infected BMMs stimulated with IFN $\gamma$  (**Figure 2B**).

183 Previous studies have demonstrated that while *L. pneumophila* has the capacity  
184 to metabolize glucose, it does not rely on glucose or glucose derivatives to fuel its  
185 replication in broth, and is largely indifferent to perturbations in BMM glycolysis during  
186 infection (36, 43-45). To test whether induction of aerobic glycolysis by IFN $\gamma$  restricts *L.*  
187 *pneumophila* replication, we performed infections using BMMs lacking hypoxia-inducible  
188 factor 1 $\alpha$  (HIF1 $\alpha$ ), which fail to upregulate glycolysis in response to inflammatory stimuli  
189 and have a defect in IFN $\gamma$ -mediated control of *Mtb* (14). We observed that HIF1 $\alpha$ -  
190 deficient BMMs resembled wild-type BMMs in terms of IFN $\gamma$ -dependent restriction and  
191 2DG rescue of *L. pneumophila* replication (**Figure 2C**). Replacement of glucose with

192 galactose, which inhibits increased glycolysis in IFN $\gamma$ -stimulated BMMs (14, 46), also  
193 did not alter the ability of IFN $\gamma$  to restrict or 2DG to rescue *L. pneumophila* replication  
194 (**Figure 2D**). Further, IFN $\gamma$  was able to mediate bacteria restriction, and 2DG was able  
195 to reverse this restriction, in BMMs cultured in glucose-free media lacking any added  
196 sugar (**Figure 2D**). Finally, we tested whether other inhibitors of glycolysis, 3-  
197 bromopyruvate (3BP) and sodium oxamate (NaO), recapitulated the effects of 2DG.  
198 Neither 3BP nor NaO reversed IFN $\gamma$ -dependent restriction of  $\Delta$ *flaA* $\Delta$ *uhpC* *L.*  
199 *pneumophila* (the 2DG-resistant strain) or  $\Delta$ *flaA* *L. pneumophila* (**Supplementary**  
200 **Figure 1**). Together, these data indicate that glycolysis inhibition is not required for  
201 IFN $\gamma$ -mediated restriction of *L. pneumophila* replication in BMMs, and suggests that  
202 effects of 2DG other than glycolysis inhibition are responsible for its interference with  
203 the cell-intrinsic IFN $\gamma$ -dependent immune response to *L. pneumophila* in BMMs.  
204  
205 **Some, but not all, unfolded protein response stimuli reverse IFN $\gamma$ -dependent**  
206 **inhibition of *L. pneumophila*.** To determine potential “off-target” effects of 2DG that  
207 could be responsible for reversal of IFN $\gamma$ -mediated restriction of *L. pneumophila*, we  
208 performed transcript profiling on BMMs stimulated with the TLR2 agonist Pam3CSK4 or  
209 infected with *L. pneumophila*, stimulated with IFN $\gamma$   $\pm$  2DG. Pathway analysis of  
210 transcripts upregulated in 2DG conditions indicated induction of endoplasmic reticulum  
211 stress, also known as the unfolded protein response (UPR, **Supplementary Figure 2**  
212 and **Supplementary Table 1**). 2DG is thought to trigger the UPR due to interference  
213 with protein glycosylation pathways in the endoplasmic reticulum (47). This led us to  
214 hypothesize that induction of the UPR perturbs IFN $\gamma$ -dependent restriction of *L.*

215 *pneumophila* replication in BMMs. In fact, we observed that other drugs that trigger UPR  
216 stress, including geldanamycin, brefeldin A, and dithiothreitol also partially rescued *L.*  
217 *pneumophila* replication in IFN $\gamma$ -stimulated BMMs (**Figure 3A**). However, not all drugs  
218 that trigger the UPR rescued *L. pneumophila* replication in IFN $\gamma$ -treated BMMs. For  
219 example, treatment of BMMs with the potent UPR inducers tunicamycin or thapsigargin  
220 did not affect IFN $\gamma$ -mediated restriction of *L. pneumophila* replication (**Figure 3B**).

221 One effect of UPR stress is arrest of protein translation via the PERK/EIF2 $\alpha$   
222 pathway, which can be reversed by the drug ISRIB (48). Importantly, ISRIB treatment  
223 did not interfere with 2DG- or geldanamycin-mediated rescue of *L. pneumophila*  
224 replication in IFN $\gamma$ -stimulated BMMs, indicating that reversal of IFN $\gamma$  -mediated  
225 restriction does not result from a global block in translation (**Figure 3C**). We confirmed  
226 that UPR stimuli and ISRIB were inducing UPR-associated transcripts and inhibiting  
227 ATF4-associated transcripts, respectively, via global transcript profiling  
228 (**Supplementary Figure 3B**) (49). Taken together, these results suggest that while  
229 some UPR-triggering drugs can partially reverse IFN $\gamma$ -dependent restriction of *L.*  
230 *pneumophila* replication in BMMs, induction of the UPR does not inherently interfere  
231 with IFN $\gamma$ -mediated restriction. Additionally, the partial rescue of bacterial replication in  
232 IFN $\gamma$ -stimulated BMMs by UPR-triggering drugs does not act exclusively through  
233 general inhibition of protein translation.

234

235 **IFN $\gamma$  fully restricts *L. pneumophila* in BMMs lacking IRG1, but is only partially**  
236 **restrictive in BMMs lacking both IRG1 and iNOS.** Our analysis above revealed that  
237 certain UPR-stimulating drugs rescue *L. pneumophila* replication in IFN $\gamma$ -stimulated

238 BMMs, while others do not. We speculated that we could use these stimuli as a filter to  
239 look for transcripts associated with a restrictive vs. permissive macrophage state. Using  
240 this logic to filter results from RNAseq analysis of BMMs stimulated with Pam3CSK4 ±  
241 IFN $\gamma$  ± UPR stimuli, we identified two genes, *Nos2* (encoding iNOS) and *Acod1*  
242 (encoding IRG1), whose transcript levels were elevated in restrictive conditions and  
243 lowered in permissive conditions (**Supplementary Figure 4A** and data not shown).  
244 Since iNOS deficiency has no effect on IFN $\gamma$ -mediated control of *L. pneumophila*  
245 replication (e.g. Figure 1B), we speculated that IRG1 may restrict *L. pneumophila*  
246 replication in IFN $\gamma$ -stimulated BMMs, as suggested (but not directly tested) previously  
247 (21). Using immortalized BMMs derived from C57BL/6 mice that inducibly express Cas9  
248 (iCas9), we targeted *Acod1* and *Ifngr* with guide RNAs to generate BMMs that lack  
249 expression of IRG1 and IFN $\gamma$  receptor, respectively (**Supplementary Figure 5** and  
250 **Table 1**). In comparison with *Ifngr*-targeted BMMs, which fail to restrict *L. pneumophila*  
251 when stimulated with IFN $\gamma$ , we observed that *Acod1*-targeted immortalized BMMs fully  
252 retained the ability to restrict *L. pneumophila* replication upon stimulation with IFN $\gamma$   
253 (**Figure 4A**). We next generated primary BMMs from *Acod1*<sup>-/-</sup> mice derived on the  
254 C57BL6/NJ background (26). Similar to immortalized BMMs, primary *Acod1*<sup>-/-</sup> BMMs  
255 displayed intact IFN $\gamma$ -dependent restriction of *L. pneumophila* (**Figure 4B**). These  
256 results suggest that IRG1 activity alone is not required for restriction of *L. pneumophila*  
257 in IFN $\gamma$ -stimulated macrophages.

258 We next tested the hypothesis that iNOS and IRG1 activity are redundant in  
259 terms of effecting restriction of *L. pneumophila* in IFN $\gamma$ -stimulated BMMs. In line with  
260 this hypothesis, we observed a partial (~10-fold) loss of restriction in *Acod1*<sup>-/-</sup> BMMs

261 treated with the iNOS inhibitor 1400W, indicating that in the absence of IRG1, iNOS  
262 function is required to mediate full restriction of *L. pneumophila* in IFN $\gamma$ -stimulated  
263 BMMs (**Figure 4C**). Reinforcing the idea that the activities of iNOS and IRG1 are  
264 redundant in terms of the IFN $\gamma$ -coordinated response to *L. pneumophila*, we observed  
265 that targeting of both *Nos2* and *Acod1*, but not each factor independently, in iCas9  
266 BMMs resulted in a marked loss of IFN $\gamma$ -dependent restriction of *L. pneumophila*  
267 (**Figure 4D**). We next crossed *Nos2*<sup>-/-</sup> and *Acod1*<sup>-/-</sup> mice to derive littermate *Nos2*<sup>-/-</sup>  
268 *Acod1*<sup>-/-</sup> and *Nos2*<sup>+/-</sup>*Acod1*<sup>-/-</sup> mice. We observed greater loss of IFN $\gamma$ -dependent *L.*  
269 *pneumophila* restriction in *Nos2*<sup>-/-</sup>*Acod1*<sup>-/-</sup> relative to *Nos2*<sup>+/-</sup>*Acod1*<sup>-/-</sup> BMMs (**Figure**  
270 **4E and 4F**). In sum, these results indicate that the function of either iNOS or IRG1 must  
271 be intact to mediate full restriction of *L. pneumophila* replication in IFN $\gamma$ -stimulated  
272 macrophages. This result suggests that activation of each of these factors by IFN $\gamma$  is  
273 sufficient, individually, to mediate full restriction of *L. pneumophila*.

274

275 **BMMs deficient in six genes are fully defective in restriction *L. pneumophila* upon**  
276 **stimulation by IFN $\gamma$ .** While it appears that iNOS and IRG1 are sufficient and redundant  
277 in coordinating a large proportion of *L. pneumophila* restriction in IFN $\gamma$ -stimulated  
278 BMMs, we observed that BMMs deficient in both iNOS and IRG1 retain partial  
279 restriction of *L. pneumophila* replication (**Figure 4D – 4F**). In an effort to pinpoint the  
280 additional factors that mediate IFN $\gamma$ -dependent restriction of *L. pneumophila* in BMMs,  
281 we made use of existing QKO mice lacking functional iNOS, NADPH oxidase 2 (NOX2),  
282 and immunity-related GTPase family M members 1 and 3 (IRGM1, IRGM3) (20). To test  
283 the hypothesis that the six factors implicated across our observations (iNOS, IRG1) and

284 the studies by Pilla *et al* (QKO, CASP11) and Naujoks *et al* (IRG1) comprise the entirety  
285 of the IFN $\gamma$ -coordinated response to *L. pneumophila* in macrophages, we employed  
286 CRISPR/Cas9 to target *Casp11* and *Acod1* (**Table 1**) in QKO mouse embryos to  
287 generate three novel mouse strains: QKO mice that also lack functional CASP11  
288 (QKO/C11), QKO mice that also lack functional IRG1 (QKO/IRG1), and QKO mice that  
289 additionally lack both CASP11 and IRG1 (6KO). As previously reported, and in line with  
290 our observations in *Nos2* single knockout BMMs, we observed that IFN $\gamma$ -dependent  
291 restriction of *L. pneumophila* in QKO BMMs was largely intact, indicating that no gene  
292 disrupted in these cells is absolutely required for restriction of *L. pneumophila* (**Figure**  
293 **5A** and **5B**). QKO/C11 BMMs did not lose IFN $\gamma$ -mediated restriction relative to QKO  
294 BMMs (**Figure 5A** and **5B**). In contrast, we observed a striking loss of restriction in  
295 QKO/IRG1 BMMs and, effectively, a total loss of *L. pneumophila* restriction in 6KO  
296 BMMs stimulated with IFN $\gamma$  (**Figure 5A** and **5B**).

297 If the ability of 2DG to rescue *L. pneumophila* in IFN $\gamma$ -treated BMMs acts through  
298 inhibition of iNOS and IRG1, we would expect 2DG to have no effect in BMMs lacking  
299 expression of these factors. In fact, we observed that in comparison with QKO BMMs,  
300 2DG retained the ability to partially rescue *L. pneumophila* replication in *Nos2*<sup>-/-</sup> *Acod1*<sup>-/-</sup>  
301 BMMs stimulated with IFN $\gamma$  (**Figure 5C**). However, the rescue effect of 2DG was  
302 absent in QKO/IRG1 BMMs (**Figure 5C**). Transcript profiling did not reveal an inhibitory  
303 effect of 2DG on expression of the other genes disrupted in the QKO/IRG1 background  
304 (**Supplementary Figure 4B**). This result indicates that 2DG may mediate some  
305 beneficial metabolic effect for *L. pneumophila* independent of regulating activity of iNOS  
306 and IRG1; however, these effects may require the other factors disrupted in the QKO

307 background. Alternately, the potential metabolic effects of 2DG may be obscured by the  
308 profound loss of restriction observed in QKO/IRG1 BMMs.

309 In sum, these results further underscore our previous observation that iNOS and  
310 IRG1 are each sufficient in terms of mediating a large proportion of the IFN $\gamma$ -dependent  
311 restriction of *L. pneumophila* in BMMs, as the addition of IRG1 deficiency to the QKO  
312 background profoundly disabled IFN $\gamma$ -mediated restriction. Further, our data reveal a  
313 partial role for CASP11 in control of *L. pneumophila* restriction in IFN $\gamma$ -stimulated  
314 BMMs, given the differences observed between QKO/IRG1 and 6KO BMMs. Finally, our  
315 results demonstrate that the six genes disrupted in 6KO BMMs, or a subset of those six  
316 that includes *Nos2*, *Acod1*, and *Casp11*, coordinate(s) the entirety of the IFN $\gamma$ -  
317 dependent, cell-intrinsic control of *L. pneumophila* observed in BMMs.

318

## 319 **Discussion**

320 Our results support a model in which IFN $\gamma$  restricts *L. pneumophila* replication in  
321 mammalian macrophages through activation of multiple redundant factors including  
322 iNOS and IRG1. To date, no study has identified a macrophage deficient in any single  
323 IFN $\gamma$ -stimulated gene that is impaired in the ability to restrict *L. pneumophila* replication  
324 when stimulated with IFN $\gamma$ . Even QKO macrophages, which lack three other potentially  
325 antimicrobial factors in addition to iNOS, do not lose IFN $\gamma$ -mediated restriction of *L.*  
326 *pneumophila*, reinforcing the notion that redundant mechanisms contribute to IFN $\gamma$ -  
327 mediated bacterial control in macrophages.

328 Our recent identification of a strain of *L. pneumophila* resistant to the direct  
329 antimicrobial effect of 2DG when growing in BMMs (36) allowed us to test the

330 hypothesis that global disruption of macrophage metabolism would interfere with the  
331 antimicrobial effects of IFN $\gamma$ . Indeed, 2DG partially reversed the restriction of *L.*  
332 *pneumophila* replication by IFN $\gamma$  in BMMs. However, neither the glycolysis inhibition  
333 activity nor the UPR induction activity of 2DG, *per se*, appears to underlie the ability of  
334 this drug to subvert the antimicrobial effect of IFN $\gamma$ . Instead, 2DG appears to regulate  
335 the IFN $\gamma$ -dependent induction of iNOS and IRG1 via some as-yet unidentified  
336 mechanism. In addition, there appears to be some effect of 2DG independent of iNOS  
337 and IRG1 regulation, suggesting that metabolic perturbation could interfere with the  
338 antimicrobial activities of IFN $\gamma$  in infected macrophages. Ultimately, experimentation  
339 with 2DG and other stimuli that reversed IFN $\gamma$ -mediated restriction of *L. pneumophila*  
340 led us to the discovery that both iNOS and IRG1 appear to be fully sufficient, and  
341 therefore redundant, in terms of mediating IFN $\gamma$ -coordinated immune response to *L.*  
342 *pneumophila* in macrophages.

343         A complex picture is emerging in terms of the role of IRG1 and the metabolite it  
344 produces, itaconate, during inflammation and infection. A direct antimicrobial role for  
345 itaconate via poisoning the bacterial glyoxylate pathway has been suggested for *Mtb*  
346 and *L. pneumophila* (21, 25). IRG1 was shown to be an essential component of the  
347 immune response to *Mtb*, as *Acod1*<sup>-/-</sup> mice succumbed more rapidly than wild-type to  
348 infection; however, IRG1 appeared to be required for regulation of non-cell-autonomous  
349 pathological inflammation, and there was no evidence for cell-intrinsic antimicrobial  
350 effects of itaconate (50). IRG1 has also been demonstrated to be protective in a model  
351 of Zika virus infection in neurons (51). Interestingly, other studies have demonstrated  
352 anti-inflammatory effects of itaconate on myeloid cells, suggesting it may act as part of a



353 negative feedback loop to control inflammation (27, 52). Beyond production of itaconate,  
354 the disruption of oxidative metabolic pathways caused by IRG1 activity may promote  
355 antimicrobial metabolic shifts in macrophages. Ultimately, diverse cell-intrinsic and  
356 intercellular roles for IRG1 and itaconate likely contribute to the immune response to a  
357 broad array of pathogens. Our data demonstrate that IRG1 is not required for the cell-  
358 intrinsic immune response to *L. pneumophila* in macrophages treated with IFN $\gamma$ , but  
359 indeed may be sufficient to coordinate IFN $\gamma$ -mediated restriction of *L. pneumophila*, as  
360 previously reported (21). Both NO generated by iNOS and itaconate generated by IRG1  
361 may be directly antimicrobial to *L. pneumophila* in macrophages stimulated with IFN $\gamma$ .  
362 Alternately or additionally, iNOS and IRG1 may act to restrict *L. pneumophila* replication  
363 via coordinating global changes in macrophage metabolism that restrict access to key  
364 bacterial metabolites or otherwise render the host macrophage inhospitable for bacterial  
365 growth.

366 Adding *Acod1* and *Casp11* deficiency to the QKO background revealed further  
367 layers of redundancy in the immune response to *L. pneumophila* coordinated by IFN $\gamma$ .  
368 While QKO/C11 macrophages did not differ meaningfully from QKO macrophages in  
369 terms of IFN $\gamma$ -mediated bacterial restriction, we observed a profound loss of restriction  
370 in QKO/IRG1 macrophages, beyond what we observed in primary *Nos2*<sup>-/-</sup> *Acod1*<sup>-/-</sup>  
371 macrophages. This result indicates that factors other than iNOS disrupted in the QKO  
372 background may play a role in limiting *L. pneumophila* in IFN $\gamma$ -stimulated macrophages.

373 In agreement with the results of Pilla *et al* (20), our data suggest that a role exists  
374 for CASP11 in the IFN $\gamma$ -mediated immune response to *L. pneumophila*, given the near-  
375 complete inability of IFN $\gamma$  to restrict *L. pneumophila* replication in 6KO macrophages vs.

376 QKO/IRG macrophages (that retain CASP11). In combination with the data showing  
377 that *Casp1/11*<sup>-/-</sup> and QKO/C11 BMMs retain IFN $\gamma$ -mediated bacterial restriction, this  
378 result demonstrates that the activity of CASP11 is also redundant, at least with the  
379 activities of iNOS and IRG1.

380 In sum, our study reveals a more comprehensive picture of the factors that are  
381 necessary and sufficient to coordinate the IFN $\gamma$ -dependent immune response to *L.*  
382 *pneumophila*. While we have not determined whether all six of the genes disrupted in  
383 6KO BMMs cells are required to fully exert IFN $\gamma$ -dependent cell-intrinsic restriction of *L.*  
384 *pneumophila* or a subset of the six that includes iNOS, IRG1, and CASP11, we are  
385 encouraged that among the numerous genes transcribed in IFN $\gamma$ -stimulated  
386 macrophages we have narrowed the field that mediate cell-intrinsic control of *L.*  
387 *pneumophila* to six candidates. While all of the gene products disrupted in the 6KO  
388 background could function directly as antimicrobial effectors, we also note the possibility  
389 that some or all may function as upstream regulators and thus affect *L. pneumophila*  
390 indirectly.

391 IFN $\gamma$  is an essential component of the immune response to bacterial pathogens  
392 beyond *L. pneumophila*. Thus, the implications of this study extend beyond furthering  
393 our understanding of the immune response to *L. pneumophila*, an accidental pathogen  
394 of mammals that did not evolve to evade the human immune response. Our work  
395 reveals fundamental redundancy in the IFN $\gamma$ -dependent immune response to potentially  
396 pathogenic environmental microbes. Dissecting these overlapping innate immune  
397 strategies reveals the complexity and comprehensiveness of the innate immune barrier  
398 posed to novel environmental microorganisms by mammalian macrophages and IFN $\gamma$ .

399 Further, a more detailed understanding of how IFN $\gamma$  can mediate bacterial restriction in  
400 host cells may inform studies of how “professional” pathogens, such as *Mtb*, *S. enterica*,  
401 and *L. monocytogenes*, have evolved to avoid or subvert these effects of IFN $\gamma$ .

402

## 403 **Materials and Methods**

404 **Ethics statement.** We conducted experiments in this study according to guidelines  
405 established by the *Guide for the Care and Use of Laboratory Animals* of the National  
406 Institutes of Health (53) under a protocol approved by the Animal Care and Use  
407 Committee at the University of California, Berkeley (AUP-2014-09-6665).

408

409 **Bone marrow-derived macrophages.** We purchased wild-type C57BL/6 (strain  
410 000664), *Ifngr*<sup>-/-</sup> (strain 003288), *Ifnar*<sup>-/-</sup> (strain 028288), *Myd88*<sup>-/-</sup> (strain 009088),  
411 *Nos2*<sup>-/-</sup> (strain 002609), *Acod1*<sup>-/-</sup> (strain 029340), and C57BL/6N (strain 005304) mice  
412 from Jackson Laboratory as a source of bone marrow to derive macrophages.

413 *Casp1/11*<sup>-/-</sup> mice were provided by A. Van der Velden and M. Starnbach (54). *Myd88*<sup>-/-</sup>

414 *Nod1*<sup>-/-</sup> *Nod2*<sup>-/-</sup> mice were generated at UC Berkeley as described previously (39).

415 *Nos2*<sup>-/-</sup> *Irg1*<sup>-/-</sup>, and *Nos2*<sup>+/-</sup> *Irg1*<sup>-/-</sup> mice were also generated by crossing in-house at UC

416 Berkeley. QKO mice (*Nos2*<sup>-/-</sup>, *Cybb*<sup>-/-</sup>, *Irgm1*<sup>-/-</sup>, *Irgm3*<sup>-/-</sup>), generously provided by the

417 lab of Christopher Sasseti at the University of Massachusetts, and mice lacking a

418 section of chromosome 3 containing GBPs 1, 2, 3, 5, and 7 (*Gbp*<sup>chr3-/-</sup>) and wild-type

419 control mice (*Gbp*<sup>chr3+/+</sup>), all on the C57BL/6 background were generated as described

420 (20). We derived bone marrow-derived macrophages (BMMs) in RPMI supplemented

421 with 10% fetal bovine serum, 2.0 mM L-glutamine, 100  $\mu$ M streptomycin (all from Life  
422 Technologies), and 5% supernatant from 3T3 cells expressing macrophage colony-  
423 stimulating factor (generated in-house). Macrophages derived from LysMCre<sup>+/+</sup> and  
424 LysMCre<sup>+/+</sup> *Atg5*<sup>fl/fl</sup> mice on the C57BL/6 background were provided by Daniel Portnoy  
425 and Jeffery Cox at UC Berkeley. Macrophages derived from LysMCre<sup>+/+</sup> and  
426 LysMCre<sup>+/+</sup> *Hif1a*<sup>fl/fl</sup> mice on the C57BL/6 background were provided by Sarah Stanley  
427 at UC Berkeley.

428

429 **Mouse CRISPR.** We generated QKO/C11 and QKO/IRG1 mice by pronuclear injection  
430 of Cas9 mRNA and guide RNAs into fertilized embryos of QKO mice as described  
431 previously (55). Founder male mice heterozygous for mutation in either *Casp11* or  
432 *Acod1* were backcrossed once onto the QKO background and offspring were  
433 intercrossed to generate QKO/C11, QKO/IRG1, and 6KO mice. *Acod1* mutation was  
434 determined by amplifying a fragment of genomic DNA surrounding the cut site targeted  
435 in *Acod1* exon 2 (forward primer: AACTCTGGGAATGCCAGCTC, reverse primer:  
436 GGAGCCACAACAGGGATCAA, yielding a ~440 base-pair PCR product) and Sanger  
437 sequencing, which revealed a three-nucleotide deletion (TTC) and a one-nucleotide  
438 insertion (A) at the cut site in mutant DNA resulting in a frame-shift mutation and  
439 premature stop codon. *Casp11* mutation was determined by amplifying genomic DNA  
440 surrounding the cut sites indicated by both guide RNAs (forward primer:  
441 GGGGCTCTGAAAAGGTGTGA, reverse primer: TCTAGACACAAAGCCCATGT,  
442 revealing a ~520-base pair band in wild-type DNA and a ~290-base pair band in mutant  
443 DNA, indicating a missing ~230-base pair fragment in mutant genomic DNA.

444

445 **iCas9 CRISPR.** We cloned template DNA for the indicated guide RNAs into a pLX-  
446 sgRNA construct additionally containing blasticidin resistance (Addgene plasmid  
447 #50662). We transfected constructs into HEK293T cells along with lentivirus packaging  
448 vector pSPAX2 (Addgene plasmid #12260) and lentivirus envelope vector VSV-G  
449 (Addgene plasmid #8454). We used the resulting virus particles to transduce  
450 immortalized wild-type C57BL/6 cells that express doxycycline-inducible SpCas9  
451 enzyme (generated using Addgene plasmid #50661). We cultured transduced cells in  
452 3.0 µg/ml blasticidin (Invivogen) and 5.0 µg/ml doxycycline (Sigma) for at least two  
453 weeks prior to use in experiments.

454

455 **Bacterial strains, infection and stimulation of BMMs.** LP02 is a thymidine auxotroph  
456 derived from LP01, a clinical isolate of *L. pneumophila* (56). Generation of  $\Delta flaA$  and  
457 luminescent strains of *L. pneumophila* have been described previously (36, 37). We  
458 cultured all strains of *L. pneumophila* in AYE (ACES-buffered yeast extract broth) or on  
459 ACES-buffered charcoal-yeast extract (BCYE) agar plates at 37 °C. For measurement  
460 of intracellular *L. pneumophila* growth by luminescence or by CFU, we plated 100k  
461 BMMs/well in opaque white TC-treated 96-well microtiter plates and infected with *L.*  
462 *pneumophila* at a multiplicity of infection of 0.05. One hour post-infection by  
463 centrifugation at 287 × *g*, we replaced the media of infected BMMs with media ±  
464 stimulation at indicated concentrations. At the indicated times following infection, we  
465 measured bacterial growth by detection of luminescence at  $\lambda = 470$  using a Spectramax  
466 L luminometer (Bio-Rad) or by dilution of infected cultures on BYCE agar plates for

467 enumeration of CFU. Pam3CSK4 and *E. coli*-derived LPS were purchased from  
468 Invivogen. As indicated, we added recombinant mouse IFN $\gamma$  (ThermoFisher), 2-  
469 deoxyglucose (Abcam), brefeldin A (BD), 1400W (Cayman Chemical), 3-bromopyruvate,  
470 sodium oxamate, galactose, geldanamycin, dithiothreitol, tunicamycin, thapsigargin, and  
471 ISRIB (all from Sigma). We performed lactate and glucose measurement with kits  
472 purchased from Sigma according to manufacturer instructions.

473

474 **Western Blot.** Following stimulation for 24 hours, we mixed lysates derived from 1.0 x  
475 10<sup>6</sup> BMMs per stimulation condition with SDS sample buffer (40% glycerol, 8% SDS,  
476 2% 2-mercaptoethanol, 40 mM EDTA, 0.05% bromophenol blue and 250 mM Tris-HCl,  
477 pH 6.8), boiled for 5 min and then separated by SDS-PAGE. Rabbit Anti-IRG1 antibody  
478 was from Abcam (ab222417) and mouse anti- $\beta$  actin antibody was from Santa Cruz  
479 (47778).

480

481 **RNAseq.** We submitted RNA purified from the indicated cell culture conditions using an  
482 RNeasy kit (Qiagen) to the QB3-Berkeley Functional Genomics Laboratory, where  
483 single-read 100 base pair read length (SR100) sequencing libraries were generated.  
484 Libraries were sequenced using either a HiSeq2500 System (Illumina) at the New York  
485 Genome Center (New York, NY) or a HiSeq4000 System (Illumina) at the Vincent J.  
486 Coates Genomics Sequencing Laboratory at UC Berkeley. We performed alignment,  
487 differential expression analysis, and gene set enrichment as described previously (57-  
488 59).

489

490 **Data Availability.** We deposited the RNAseq data associated with this study in the  
491 NCBI Gene Expression Omnibus, available at <https://www.ncbi.nlm.nih.gov/geo/> via  
492 accession numbers GSE135385 and GSE135386.

493 **Acknowledgements**

494 R.E.V. is supported by an Investigator Award from the Howard Hughes Medical Institute  
495 and by NIH grants AI063302 and AI075039. We would like to thank Harmandeep  
496 Dhaliwal at the Cancer Research Laboratory Gene Targeting Facility at UC Berkeley for  
497 assistance in generating mouse strains used in this study. We would also like to thank  
498 Kevin Barry for assistance with RNAseq analysis. We acknowledge stimulating  
499 discussions with Sarah Stanley, Jonathan Braverman, Greg Barton, Daniel Portnoy, and  
500 members of the Vance, Stanley, Barton, and Portnoy Labs, and members of the P01  
501 Intracellular Pathogens and Innate Immunity research group. The authors have no  
502 conflicts of interest with regard to the results presented in this study.



503 **References**

- 504 1. Price JV, Vance RE. 2014. The macrophage paradox. *Immunity* 41:685-93.
- 505 2. Bustamante J, Boisson-Dupuis S, Abel L, Casanova JL. 2014. Mendelian  
506 susceptibility to mycobacterial disease: genetic, immunological, and clinical  
507 features of inborn errors of IFN-gamma immunity. *Semin Immunol* 26:454-70.
- 508 3. Cooper AM, Dalton DK, Stewart TA, Griffin JP, Russell DG, Orme IM. 1993.  
509 Disseminated tuberculosis in interferon gamma gene-disrupted mice. *J Exp Med*  
510 178:2243-7.
- 511 4. Flynn JL, Chan J, Triebold KJ, Dalton DK, Stewart TA, Bloom BR. 1993. An  
512 essential role for interferon gamma in resistance to *Mycobacterium tuberculosis*  
513 infection. *J Exp Med* 178:2249-54.
- 514 5. Harty JT, Bevan MJ. 1995. Specific immunity to *Listeria monocytogenes* in the  
515 absence of IFN gamma. *Immunity* 3:109-17.
- 516 6. Bao S, Beagley KW, France MP, Shen J, Husband AJ. 2000. Interferon-gamma  
517 plays a critical role in intestinal immunity against *Salmonella typhimurium*  
518 infection. *Immunology* 99:464-72.
- 519 7. Murphy EA, Sathiyaseelan J, Parent MA, Zou B, Baldwin CL. 2001. Interferon-  
520 gamma is crucial for surviving a *Brucella abortus* infection in both resistant  
521 C57BL/6 and susceptible BALB/c mice. *Immunology* 103:511-8.
- 522 8. Shinozawa Y, Matsumoto T, Uchida K, Tsujimoto S, Iwakura Y, Yamaguchi K.  
523 2002. Role of interferon-gamma in inflammatory responses in murine respiratory  
524 infection with *Legionella pneumophila*. *J Med Microbiol* 51:225-30.

- 525 9. Archer KA, Alexopoulou L, Flavell RA, Roy CR. 2009. Multiple MyD88-dependent  
526 responses contribute to pulmonary clearance of *Legionella pneumophila*. *Cell*  
527 *Microbiol* 11:21-36.
- 528 10. Brown AS, Yang C, Fung KY, Bachem A, Bourges D, Bedoui S, Hartland EL, van  
529 Driel IR. 2016. Cooperation between Monocyte-Derived Cells and Lymphoid  
530 Cells in the Acute Response to a Bacterial Lung Pathogen. *PLoS Pathog*  
531 12:e1005691.
- 532 11. MacMicking JD, North RJ, LaCourse R, Mudgett JS, Shah SK, Nathan CF. 1997.  
533 Identification of nitric oxide synthase as a protective locus against tuberculosis.  
534 *Proc Natl Acad Sci U S A* 94:5243-8.
- 535 12. Khan IA, Schwartzman JD, Matsuura T, Kasper LH. 1997. A dichotomous role for  
536 nitric oxide during acute *Toxoplasma gondii* infection in mice. *Proc Natl Acad Sci*  
537 *U S A* 94:13955-60.
- 538 13. Chakravorty D, Hensel M. 2003. Inducible nitric oxide synthase and control of  
539 intracellular bacterial pathogens. *Microbes Infect* 5:621-7.
- 540 14. Braverman J, Sogi KM, Benjamin D, Nomura DK, Stanley SA. 2016. HIF-1alpha  
541 Is an Essential Mediator of IFN-gamma-Dependent Immunity to *Mycobacterium*  
542 *tuberculosis*. *J Immunol* 197:1287-97.
- 543 15. Braverman J, Stanley SA. 2017. Nitric Oxide Modulates Macrophage Responses  
544 to *Mycobacterium tuberculosis* Infection through Activation of HIF-1alpha and  
545 Repression of NF-kappaB. *J Immunol* 199:1805-1816.
- 546 16. Mishra BB, Rathinam VA, Martens GW, Martinot AJ, Kornfeld H, Fitzgerald KA,  
547 Sasseti CM. 2013. Nitric oxide controls the immunopathology of tuberculosis by

- 548 inhibiting NLRP3 inflammasome-dependent processing of IL-1 $\beta$ . *Nat Immunol*  
549 14:52-60.
- 550 17. Mishra BB, Lovewell RR, Olive AJ, Zhang G, Wang W, Eugenin E, Smith CM,  
551 Phuah JY, Long JE, Dubuke ML, Palace SG, Goguen JD, Baker RE, Nambi S,  
552 Mishra R, Booty MG, Baer CE, Shaffer SA, Dartois V, McCormick BA, Chen X,  
553 Sasseti CM. 2017. Nitric oxide prevents a pathogen-permissive granulocytic  
554 inflammation during tuberculosis. *Nat Microbiol* 2:17072.
- 555 18. Nathan C. 1997. Inducible nitric oxide synthase: what difference does it make? *J*  
556 *Clin Invest* 100:2417-23.
- 557 19. Summersgill JT, Powell LA, Buster BL, Miller RD, Ramirez JA. 1992. Killing of  
558 *Legionella pneumophila* by nitric oxide in gamma-interferon-activated  
559 macrophages. *J Leukoc Biol* 52:625-9.
- 560 20. Pilla DM, Hagar JA, Haldar AK, Mason AK, Degrandi D, Pfeffer K, Ernst RK,  
561 Yamamoto M, Miao EA, Coers J. 2014. Guanylate binding proteins promote  
562 caspase-11-dependent pyroptosis in response to cytoplasmic LPS. *Proc Natl*  
563 *Acad Sci U S A* 111:6046-51.
- 564 21. Naujoks J, Tabeling C, Dill BD, Hoffmann C, Brown AS, Kunze M, Kempa S,  
565 Peter A, Mollenkopf HJ, Dorhoi A, Kershaw O, Gruber AD, Sander LE,  
566 Witznath M, Herold S, Nerlich A, Hocke AC, van Driel I, Suttorp N, Bedoui S,  
567 Hilbi H, Trost M, Opitz B. 2016. IFNs Modify the Proteome of *Legionella*-  
568 Containing Vacuoles and Restrict Infection Via IRG1-Derived Itaconic Acid. *PLoS*  
569 *Pathog* 12:e1005408.

- 570 22. Ellis TN, Beaman BL. 2004. Interferon-gamma activation of polymorphonuclear  
571 neutrophil function. *Immunology* 112:2-12.
- 572 23. Casbon AJ, Long ME, Dunn KW, Allen LA, Dinauer MC. 2012. Effects of IFN-  
573 gamma on intracellular trafficking and activity of macrophage NADPH oxidase  
574 flavocytochrome b558. *J Leukoc Biol* 92:869-82.
- 575 24. Lippmann J, Muller HC, Naujoks J, Tabeling C, Shin S, Witzentrath M, Hellwig K,  
576 Kirschning CJ, Taylor GA, Barchet W, Bauer S, Suttorp N, Roy CR, Opitz B.  
577 2011. Dissection of a type I interferon pathway in controlling bacterial intracellular  
578 infection in mice. *Cell Microbiol* 13:1668-82.
- 579 25. Michelucci A, Cordes T, Ghelfi J, Pailot A, Reiling N, Goldmann O, Binz T,  
580 Wegner A, Tallam A, Rausell A, Buttini M, Linster CL, Medina E, Balling R, Hiller  
581 K. 2013. Immune-responsive gene 1 protein links metabolism to immunity by  
582 catalyzing itaconic acid production. *Proc Natl Acad Sci U S A* 110:7820-5.
- 583 26. Lampropoulou V, Sergushichev A, Bambouskova M, Nair S, Vincent EE,  
584 Loginicheva E, Cervantes-Barragan L, Ma X, Huang SC, Griss T, Weinheimer  
585 CJ, Khader S, Randolph GJ, Pearce EJ, Jones RG, Diwan A, Diamond MS,  
586 Artyomov MN. 2016. Itaconate Links Inhibition of Succinate Dehydrogenase with  
587 Macrophage Metabolic Remodeling and Regulation of Inflammation. *Cell Metab*  
588 24:158-66.
- 589 27. Hooftman A, O'Neill LAJ. 2019. The Immunomodulatory Potential of the  
590 Metabolite Itaconate. *Trends Immunol* doi:10.1016/j.it.2019.05.007.
- 591 28. Ensminger AW, Isberg RR. 2009. *Legionella pneumophila* Dot/Icm translocated  
592 substrates: a sum of parts. *Curr Opin Microbiol* 12:67-73.

- 593 29. Molofsky AB, Byrne BG, Whitfield NN, Madigan CA, Fuse ET, Tateda K,  
594 Swanson MS. 2006. Cytosolic recognition of flagellin by mouse macrophages  
595 restricts *Legionella pneumophila* infection. *J Exp Med* 203:1093-104.
- 596 30. Ren T, Zamboni DS, Roy CR, Dietrich WF, Vance RE. 2006. Flagellin-deficient  
597 *Legionella* mutants evade caspase-1- and Naip5-mediated macrophage  
598 immunity. *PLoS Pathog* 2:e18.
- 599 31. Lightfield KL, Persson J, Brubaker SW, Witte CE, von Moltke J, Dunipace EA,  
600 Henry T, Sun YH, Cado D, Dietrich WF, Monack DM, Tsolis RM, Vance RE.  
601 2008. Critical function for Naip5 in inflammasome activation by a conserved  
602 carboxy-terminal domain of flagellin. *Nat Immunol* 9:1171-8.
- 603 32. Zamboni DS, Kobayashi KS, Kohlsdorf T, Ogura Y, Long EM, Vance RE, Kuida  
604 K, Mariathasan S, Dixit VM, Flavell RA, Dietrich WF, Roy CR. 2006. The Birc1e  
605 cytosolic pattern-recognition receptor contributes to the detection and control of  
606 *Legionella pneumophila* infection. *Nat Immunol* 7:318-25.
- 607 33. Amer A, Franchi L, Kanneganti TD, Body-Malapel M, Ozoren N, Brady G,  
608 Meshinchi S, Jagirdar R, Gewirtz A, Akira S, Nunez G. 2006. Regulation of  
609 *Legionella* phagosome maturation and infection through flagellin and host Ipaf. *J*  
610 *Biol Chem* 281:35217-23.
- 611 34. Wright EK, Goodart SA, Growney JD, Hadinoto V, Endrizzi MG, Long EM,  
612 Sadigh K, Abney AL, Bernstein-Hanley I, Dietrich WF. 2003. Naip5 affects host  
613 susceptibility to the intracellular pathogen *Legionella pneumophila*. *Curr Biol*  
614 13:27-36.

- 615 35. Diez E, Lee SH, Gauthier S, Yaraghi Z, Tremblay M, Vidal S, Gros P. 2003.  
616 Birc1e is the gene within the Lgn1 locus associated with resistance to Legionella  
617 pneumophila. *Nat Genet* 33:55-60.
- 618 36. Price JV, Jiang K, Galantowicz A, Freifeld A, Vance RE. 2018. Legionella  
619 pneumophila Is Directly Sensitive to 2-Deoxyglucose-Phosphate via Its UhpC  
620 Transporter but Is Indifferent to Shifts in Host Cell Glycolytic Metabolism. *J*  
621 *Bacteriol* 200.
- 622 37. Coers J, Vance RE, Fontana MF, Dietrich WF. 2007. Restriction of Legionella  
623 pneumophila growth in macrophages requires the concerted action of cytokine  
624 and Naip5/Ipaf signalling pathways. *Cell Microbiol* 9:2344-57.
- 625 38. Goncalves AV, Margolis SR, Quirino GFS, Mascarenhas DPA, Rauch I, Nichols  
626 RD, Ansaldo E, Fontana MF, Vance RE, Zamboni DS. 2019. Gasdermin-D and  
627 Caspase-7 are the key Caspase-1/8 substrates downstream of the  
628 NAIP5/NLRC4 inflammasome required for restriction of Legionella pneumophila.  
629 *PLoS Pathog* 15:e1007886.
- 630 39. Fontana MF, Shin S, Vance RE. 2012. Activation of host mitogen-activated  
631 protein kinases by secreted Legionella pneumophila effectors that inhibit host  
632 protein translation. *Infect Immun* 80:3570-5.
- 633 40. Yang Z, Klionsky DJ. 2010. Mammalian autophagy: core molecular machinery  
634 and signaling regulation. *Curr Opin Cell Biol* 22:124-31.
- 635 41. Sauer JD, Sotelo-Troha K, von Moltke J, Monroe KM, Rae CS, Brubaker SW,  
636 Hyodo M, Hayakawa Y, Woodward JJ, Portnoy DA, Vance RE. 2011. The N-  
637 ethyl-N-nitrosourea-induced Goldenticket mouse mutant reveals an essential

- 638 function of Sting in the in vivo interferon response to *Listeria monocytogenes* and  
639 cyclic dinucleotides. *Infect Immun* 79:688-94.
- 640 42. Escoll P, Song OR, Viana F, Steiner B, Lagache T, Olivo-Marin JC, Impens F,  
641 Brodin P, Hilbi H, Buchrieser C. 2017. *Legionella pneumophila* Modulates  
642 Mitochondrial Dynamics to Trigger Metabolic Repurposing of Infected  
643 Macrophages. *Cell Host Microbe* 22:302-316 e7.
- 644 43. Warren WJ, Miller RD. 1979. Growth of Legionnaires disease bacterium  
645 (*Legionella pneumophila*) in chemically defined medium. *J Clin Microbiol* 10:50-5.
- 646 44. Tesh MJ, Morse SA, Miller RD. 1983. Intermediary metabolism in *Legionella*  
647 *pneumophila*: utilization of amino acids and other compounds as energy sources.  
648 *J Bacteriol* 154:1104-9.
- 649 45. Eylert E, Herrmann V, Jules M, Gillmaier N, Lautner M, Buchrieser C, Eisenreich  
650 W, Heuner K. 2010. Isotopologue profiling of *Legionella pneumophila*: role of  
651 serine and glucose as carbon substrates. *J Biol Chem* 285:22232-43.
- 652 46. Rossignol R, Gilkerson R, Aggeler R, Yamagata K, Remington SJ, Capaldi RA.  
653 2004. Energy substrate modulates mitochondrial structure and oxidative capacity  
654 in cancer cells. *Cancer Res* 64:985-93.
- 655 47. Gaddameedhi S, Chatterjee S. 2009. Association between the unfolded protein  
656 response, induced by 2-deoxyglucose, and hypersensitivity to cisplatin: a  
657 mechanistic study employing molecular genomics. *J Cancer Res Ther* 5 Suppl  
658 1:S61-6.
- 659 48. Sidrauski C, Acosta-Alvear D, Khoutorsky A, Vedantham P, Hearn BR, Li H,  
660 Gamache K, Gallagher CM, Ang KK, Wilson C, Okreglak V, Ashkenazi A, Hann

- 661 B, Nader K, Arkin MR, Renslo AR, Sonenberg N, Walter P. 2013.  
662 Pharmacological brake-release of mRNA translation enhances cognitive  
663 memory. *Elife* 2:e00498.
- 664 49. Pakos-Zebrucka K, Koryga I, Mnich K, Ljujic M, Samali A, Gorman AM. 2016.  
665 The integrated stress response. *EMBO Rep* 17:1374-1395.
- 666 50. Nair S, Huynh JP, Lampropoulou V, Loginicheva E, Esaulova E, Gounder AP,  
667 Boon ACM, Schwarzkopf EA, Bradstreet TR, Edelson BT, Artyomov MN,  
668 Stallings CL, Diamond MS. 2018. Irg1 expression in myeloid cells prevents  
669 immunopathology during *M. tuberculosis* infection. *J Exp Med* 215:1035-1045.
- 670 51. Daniels BP, Kofman SB, Smith JR, Norris GT, Snyder AG, Kolb JP, Gao X,  
671 Locasale JW, Martinez J, Gale M, Jr., Loo YM, Oberst A. 2019. The Nucleotide  
672 Sensor ZBP1 and Kinase RIPK3 Induce the Enzyme IRG1 to Promote an  
673 Antiviral Metabolic State in Neurons. *Immunity* 50:64-76 e4.
- 674 52. Mills EL, Ryan DG, Prag HA, Dikovskaya D, Menon D, Zaslona Z, Jedrychowski  
675 MP, Costa ASH, Higgins M, Hams E, Szpyt J, Runtsch MC, King MS, McGouran  
676 JF, Fischer R, Kessler BM, McGettrick AF, Hughes MM, Carroll RG, Booty LM,  
677 Knatko EV, Meakin PJ, Ashford MLJ, Modis LK, Brunori G, Sevin DC, Fallon PG,  
678 Caldwell ST, Kunji ERS, Chouchani ET, Frezza C, Dinkova-Kostova AT, Hartley  
679 RC, Murphy MP, O'Neill LA. 2018. Itaconate is an anti-inflammatory metabolite  
680 that activates Nrf2 via alkylation of KEAP1. *Nature* 556:113-117.
- 681 53. (ed). 2011. Guide for the care and use of laboratory animals. National Academies  
682 Press,, Washington, D.C. <http://www.ncbi.nlm.nih.gov/books/NBK54050>  
683 ebrary <http://site.ebrary.com/id/10443276>



- 684 National Academies Press [http://www.nap.edu/catalog.php?record\\_id=12910](http://www.nap.edu/catalog.php?record_id=12910)
- 685 National Academies Press [http://www.nap.edu/catalog.php?record\\_id=12910\\_toc](http://www.nap.edu/catalog.php?record_id=12910_toc)
- 686 <http://www.ncbi.nlm.nih.gov/bookshelf/br.fcgi?book=nap12910>
- 687 <http://grants.nih.gov/grants/olaw/Guide-for-the-Care-and-use-of-laboratory-animals.pdf>.
- 688 Accessed
- 689 54. Li P, Allen H, Banerjee S, Franklin S, Herzog L, Johnston C, McDowell J,  
690 Paskind M, Rodman L, Salfeld J, et al. 1995. Mice deficient in IL-1 beta-  
691 converting enzyme are defective in production of mature IL-1 beta and resistant  
692 to endotoxic shock. *Cell* 80:401-11.
- 693 55. Wang H, Yang H, Shivalila CS, Dawlaty MM, Cheng AW, Zhang F, Jaenisch R.  
694 2013. One-step generation of mice carrying mutations in multiple genes by  
695 CRISPR/Cas-mediated genome engineering. *Cell* 153:910-8.
- 696 56. Berger KH, Isberg RR. 1993. Two distinct defects in intracellular growth  
697 complemented by a single genetic locus in *Legionella pneumophila*. *Mol*  
698 *Microbiol* 7:7-19.
- 699 57. Trapnell C, Roberts A, Goff L, Pertea G, Kim D, Kelley DR, Pimentel H, Salzberg  
700 SL, Rinn JL, Pachter L. 2012. Differential gene and transcript expression analysis  
701 of RNA-seq experiments with TopHat and Cufflinks. *Nat Protoc* 7:562-78.
- 702 58. Bray NL, Pimentel H, Melsted P, Pachter L. 2016. Near-optimal probabilistic  
703 RNA-seq quantification. *Nat Biotechnol* 34:525-7.
- 704 59. Zhou Y, Zhou B, Pache L, Chang M, Khodabakhshi AH, Tanaseichuk O, Benner  
705 C, Chanda SK. 2019. Metascape provides a biologist-oriented resource for the  
706 analysis of systems-level datasets. *Nat Commun* 10:1523.

707 **Figure Legends.**

708

709 **Figure 1. IFN $\gamma$  restricts *L. pneumophila* replication across a spectrum of immune**

710 **response-impaired macrophage genotypes. (A)** Luminescence measured in relative

711 light units (RLU, left) and recovery of colony forming units (CFU, right) of LP02  $\Delta$ *flaA* lux

712 *L. pneumophila* from infected wild-type C57BL/6 BMMs either not stimulated (no stim)

713 or stimulated with 6.0 ng/mL IFN $\gamma$ . **(B)** RLU from LP02  $\Delta$ *flaA* lux *L. pneumophila* from

714 infected *Ifngr*<sup>-/-</sup> and *Nos2*<sup>-/-</sup> BMMs either not stimulated or stimulated with 6.0 ng/mL

715 IFN $\gamma$ . **(C)** RLU from LP02  $\Delta$ *flaA* lux *L. pneumophila* from infected *Myd88*<sup>-/-</sup> and *Myd88*<sup>-</sup>

716 <sup>-</sup>*Nod1*<sup>-/-</sup> *Nod2*<sup>-/-</sup> BMMs either not stimulated or stimulated with 6.0 ng/mL IFN $\gamma$ . **(D)**

717 RLU from LP02  $\Delta$ *flaA* lux *L. pneumophila* from infected LysMCre<sup>+</sup> *Atg5*<sup>fl/fl</sup> and LysMCre<sup>+</sup>

718 BMMs either not stimulated or stimulated with 6.0 ng/mL IFN $\gamma$ . **(E)** RLU from LP02

719  $\Delta$ *flaA* lux *L. pneumophila* from infected *Gbp*<sup>chr3 -/-</sup>, *Gbp*<sup>chr3 +/-</sup>, and *Casp1/11*<sup>-/-</sup> BMMs

720 either unstimulated or stimulated with 6.0 ng/mL IFN $\gamma$ . Data reflect individual

721 experiments that represent at least two independent experiments. Error bars in all

722 graphs represent standard deviation of the mean of at least three technical replicates. p

723 < 0.001 comparing no stim vs. IFN $\gamma$  curves in all genotypes of BMMs (except *Ifngr*<sup>-/-</sup>) by

724 2-way ANOVA. No stim and IFN $\gamma$  curves do not differ significantly in *Ifngr*<sup>-/-</sup> BMMs.

725

726 **Figure 2. 2DG rescues *L. pneumophila* replication in IFN $\gamma$ -stimulated**

727 **macrophages. (A)** RLU (left) and CFU (right) of LP02  $\Delta$ *flaA* $\Delta$ *uhpC* lux *L. pneumophila*

728 from infected WT C57BL/6 BMMs either not stimulated (no stim), stimulated with 6.0

729 ng/mL IFN $\gamma$  (IFN $\gamma$ ), or stimulated with 6.0 ng/mL IFN $\gamma$  + 2.0 mM 2DG (IFN $\gamma$ /2DG).  $p <$   
730 0.001 comparing all curves to each other in each graph by 2-way ANOVA. **(B)** Lactate  
731 secretion (left) and glucose consumption (right) measured in cell culture media following  
732 infection of WT C57BL/6 BMMs with LP02  $\Delta flaA\Delta uhpC$  lux *L. pneumophila* and  
733 stimulated with 6.0 ng/mL IFN $\gamma$  and 1.0 mM 2DG as indicated. \*\* =  $p < 0.01$ ; \* =  $p <$   
734 0.05; ns = not significant comparing indicated curves by 2-way ANOVA. **(C)** RLU from  
735 LP02  $\Delta flaA\Delta uhpC$  lux *L. pneumophila* from infected LysMCre<sup>+</sup> *Hif1a*<sup>fl/fl</sup> and LysMCre<sup>+</sup>  
736 BMMs not stimulated or stimulated with 6.0 ng/mL IFN $\gamma$  and 2.0 mM 2DG as indicated.  
737  $p < 0.01$  comparing all curves to each other corresponding to each genotype by 2-way  
738 ANOVA. **(D)** RLU from LP02  $\Delta flaA\Delta uhpC$  lux *L. pneumophila* from infected WT  
739 C57BL/6 BMMs stimulated with 6.0 ng/mL IFN $\gamma$  and 2.0 mM 2DG as indicated and  
740 cultured in infection media containing 11.11 mM glucose (left), 11.11 mM galactose in  
741 the absence of glucose (center), and in glucose-free media with no exogenous source  
742 of sugar (right).  $p < 0.001$  comparing all curves to each other in each graph by 2-way  
743 ANOVA. Data reflect results of individual experiments that represent at least three  
744 independent experiments. Error bars in all graphs represent standard deviation of the  
745 mean of at least three technical replicates.

746

747 **Figure 3. Differential effect of UPR stress stimuli on rescue of *L. pneumophila***  
748 **replication in IFN $\gamma$ -stimulated macrophages. (A)** RLU from LP02  $\Delta flaA\Delta uhpC$  lux *L.*  
749 *pneumophila* from infected WT C57BL/6 BMMs stimulated for 48 hours post-infection  
750 with 6.0 ng/mL IFN $\gamma$ , 2.0 mM 2DG, 2.0  $\mu$ M geldanamycin (geld.), 1.0  $\mu$ g/ml brefeldin A  
751 (BfA), and 2.0 mM dithiothreitol (DTT) as indicated. **(B)** RLU from LP02  $\Delta flaA\Delta uhpC$  lux

752 *L. pneumophila* from infected WT C57BL/6 BMMs stimulated for 48 hours post-infection  
753 with 6.0 ng/mL IFN $\gamma$ , 10.0  $\mu$ M tunicamycin (tunic.), and 25.0 nM thapsigargin (thaps.) as  
754 indicated. (C) RLU from LP02  $\Delta$ *flaA* $\Delta$ *uhpC* lux *L. pneumophila* from infected WT  
755 C57BL/6 BMMs stimulated for 48 hours post-infection with 6.0 ng/mL IFN $\gamma$ , 2.0 mM  
756 2DG, 2.0  $\mu$ M geldanamycin, and 0.1  $\mu$ M ISRIB as indicated. \*\*\* =  $p < 0.001$ ; \*\* =  $p <$   
757 0.01; \* =  $p < 0.05$ ; ns = not significant comparing means by unpaired *t* test. Data reflect  
758 results of individual experiments that represent at least three independent experiments.  
759 Error bars in all graphs represent standard deviation of the mean of at least two  
760 technical replicates. Concentrations of UPR stimuli displayed represent a single point in  
761 a titration at which we observed maximum effect on *L. pneumophila* replication in  
762 combination with IFN $\gamma$  stimulation relative to a minimum effect on *L. pneumophila*  
763 replication in the absence of IFN $\gamma$ .

764

765 **Figure 4. BMMs lacking IRG1 retain IFN $\gamma$ -mediated restriction of *L. pneumophila***  
766 **while BMMs lacking both INOS and IRG1 lose the ability to fully restrict *L.***  
767 ***pneumophila*. (A)** RLU from LP02  $\Delta$ *flaA* lux *L. pneumophila* from infected iCas9 BMMs  
768 in which *Acod1* was targeted with two guide RNAs (iCas9::*Acod1*), *Ifngr* was targeted  
769 with one guide RNA (iCas9::*Ifngr*), or that were not manipulated (iCas9) not stimulated  
770 (no stim) or stimulated with 6.0 ng/mL IFN $\gamma$ . (B) RLU from LP02  $\Delta$ *flaA* lux *L.*  
771 *pneumophila* from infected primary *Acod1*<sup>-/-</sup>, and wild-type C57BL/6N BMMs not  
772 stimulated or stimulated with 6.0 ng/mL IFN $\gamma$ . C57BL/6N BMMs were included as a wild-  
773 type control for BMMs derived from *Acod1*<sup>-/-</sup> mice, which were generated on the  
774 C57BL/6N background. (C) RLU from LP02  $\Delta$ *flaA* lux *L. pneumophila* from infected

775 *Acod1*<sup>-/-</sup> and WT (C57BL/6N) BMMs either not stimulated (no stim), stimulated with 6.0  
776 ng/mL IFN $\gamma$ , or stimulated with 6.0 ng/mL IFN $\gamma$  + 100  $\mu$ M 1400W (IFN $\gamma$ /1400W).  $p <$   
777 0.001 comparing no stim vs. IFN $\gamma$  curves in both genotypes by 2-way ANOVA. IFN $\gamma$   
778 does not differ significantly from IFN $\gamma$ +1400W in C57BL/6N BMMs. (D) RLU from LP02  
779  $\Delta$ *flaA* lux *L. pneumophila* from infected iCas9 BMMs in which *Nos2* was targeted with  
780 two guide RNAs (iCas9::*Nos2*), *Acod1* was targeted with two guide RNAs  
781 (iCas9::*Acod1*), both *Nos2* and *Acod1* were targeted with two guide RNAs each  
782 (iCas9::*Nos2Acod1*), or that were not manipulated (iCas9) either not stimulated (no  
783 stim) or stimulated with 6.0 ng/mL IFN $\gamma$ . (E) RLU from LP02  $\Delta$ *flaA* lux *L. pneumophila*  
784 from infected primary BMMs derived from *Nos2*<sup>-/-</sup>*Acod1*<sup>-/-</sup> and littermate *Nos2*<sup>+/-</sup>  
785 *Acod1*<sup>-/-</sup> mice either not stimulated (no stim) or stimulated with 6.0 ng/mL IFN $\gamma$ . A – E:  
786 \*\*\* =  $p < 0.001$ ; \*\* =  $p < 0.01$ ; \* =  $p < 0.05$ ; ns = not significant comparing indicated  
787 curves by 2-way ANOVA. (F) LP02  $\Delta$ *flaA* lux *L. pneumophila* CFU enumerated 48 hours  
788 post-infection in BMMs derived from *Nos2*<sup>-/-</sup>*Acod1*<sup>-/-</sup> and littermate *Nos2*<sup>+/-</sup>*Acod1*<sup>-/-</sup>  
789 mice either not stimulated (no stim) or stimulated with 6.0 ng/mL IFN $\gamma$ . \*\* =  $p < 0.01$ ; \* =  
790  $p < 0.05$ ; ns = not significant comparing means by unpaired *t* test. Data reflect results of  
791 individual experiments that represent at least two independent experiments. Error bars  
792 in all graphs represent standard deviation of the mean of at least three technical  
793 replicates.

794

795 **Figure 5. QKO BMMs that additionally lack functional either CASP11 and IRG1 or**  
796 **both factors display partial to full lack of restriction of *L. pneumophila* replication**  
797 **when stimulated with IFN $\gamma$ .** (A) RLU from LP02  $\Delta$ *flaA* lux *L. pneumophila* from

798 infected C57BL/6, QKO, QKO/C11, QKO/IRG1, and 6KO BMMs either not stimulated  
799 (no stim) or stimulated with 6.0 ng/mL IFN $\gamma$ . \*\*\* =  $p < 0.001$ ; \* =  $p < 0.05$  comparing  
800 indicated curves by 2-way ANOVA. (B) CFU recovered from WT, QKO, QKO/C11,  
801 QKO/IRG1, and 6KO BMMs 48 hours following infection with LP02  $\Delta flaA$  lux *L. pneumophila*. \*\*; =  $p < 0.01$ ; \* =  $p < 0.05$ ; ns = not significant comparing means by  
802 unpaired *t* test. (C) RLU from LP02  $\Delta flaA\Delta uhpC$  lux *L. pneumophila* from infected QKO,  
803 *Nos2*<sup>-/-</sup> *Acod1*<sup>-/-</sup>, and QKO/IRG1 BMMs stimulated with 6.0 ng/mL IFN $\gamma$  and 2.0 mM  
804 2DG as indicated. \*\*\* =  $p < 0.001$ \*\*; ns = not significant comparing indicated curves by  
805 2-way ANOVA. Data reflect results of individual experiments that represent at least  
806 three independent experiments. Error bars in all graphs represent standard deviation of  
807 the mean of at least three technical replicates.

809

810 **Supplementary Figure 1. 3-bromopyruvate and sodium oxamate do not rescue**

811  **$\Delta flaA\Delta uhpC$  *L. pneumophila* replication in IFN $\gamma$ -stimulated BMMs. (A) RLU from**

812 LP02  $\Delta flaA\Delta uhpC$  lux *L. pneumophila* (left) and  $\Delta flaA$  lux *L. pneumophila* (right) from

813 infected WT C57BL/6 BMMs stimulated with 6.0 ng/mL IFN $\gamma$   $\pm$  60.0  $\mu$ M 3-

814 bromopyruvate (3BP). (C) RLU from LP02  $\Delta flaA\Delta uhpC$  lux *L. pneumophila* (left) and

815 LP02  $\Delta flaA$  lux *L. pneumophila* (right) from infected WT C57BL/6 BMMs stimulated with

816 6.0 ng/mL IFN $\gamma$  and 2.5 mM sodium oxamate (NaO). Data reflect results of individual

817 experiments that represent at least three independent experiments. Error bars in all

818 graphs represent mean  $\pm$  standard deviation of at least two technical replicates.

819 Concentrations of 3BP and NaO displayed represent the highest single point in a

820 titration at which we observed a minimum effect on *L. pneumophila* replication in the  
821 absence of IFN $\gamma$ .

822

823 **Supplementary Figure 2. 2DG triggers a transcriptional profile indicating**  
824 **endoplasmic reticulum stress in IFN $\gamma$ -stimulated BMMs. (A)** Heat map showing  
825 fragments per kilobase million (FPKM) of differentially expressed transcripts measured  
826 by RNAseq recovered from  $1.0 \times 10^6$  C57BL/6 BMMs/condition stimulated for 18 hours  
827 with 50.0 ng/ml Pam3CSK4 + 2.0 ng/ml IFN $\gamma$   $\pm$  1.5 mM 2DG and  $1.0 \times 10^6$  C57BL/6  
828 BMMs/condition infected at T<sub>0</sub> with LP02  $\Delta$ *flaA* *L. pneumophila* and stimulated 1 hour  
829 post-infection with 2.0 ng/ml IFN $\gamma$   $\pm$  1.5 mM 2DG for a total of 18 hours prior to harvest.  
830 Transcript IDs, FPKM, and log<sub>2</sub> fold-change are shown in Supplementary Table 1. Only  
831 transcripts shown to differ significantly between both Pam3CSK4/IFN $\gamma$  and *L.p.*/IFN $\gamma$   $\pm$   
832 2DG conditions, as calculated using TopHat/Cufflinks (57) are displayed. **(B)** Log<sub>10</sub> P-  
833 value of gene ontology (GO) and comprehensive resource of mammalian protein  
834 complexes (CORUM) gene sets in which transcripts significantly upregulated in + 2DG  
835 conditions are enriched as determined using Metascape (59).

836

837 **Supplementary Figure 3. Validation of UPR gene expression by UPR stimuli and**  
838 **inhibition of ATF4-dependent gene expression by ISRIB. (A)** Histograms displaying  
839 transcripts per million (TPM) of *Hspa5* (heat shock protein 5, aka BIP), *Trib3* (tribbles  
840 pseudokinase 3), *Dnajb3* (DnaJ heat shock protein family (Hsp40) member B3), *Pdia4*  
841 (protein disulfide isomerase associated 4), *Manf* (mesencephalic astrocyte-derived  
842 neurotrophic factor), and *Hyou1* (hypoxia up-regulated 1) measured by RNAseq

843 recovered from  $1.0 \times 10^6$  BMMs/condition stimulated for 18 hours with 100 ng/ml  
844 Pam3CSK4 (Pam) alone or in combination with 6.0 ng/ml IFN $\gamma$ , IFN $\gamma$  + 2.0 mM 2DG,  
845 IFN $\gamma$  + 2.0  $\mu$ M geldanamycin (Geld), IFN $\gamma$  + 1.0  $\mu$ g/ml brefeldin A (BfA), IFN $\gamma$  + 2.0 mM  
846 dithiothreitol (DTT), IFN $\gamma$  + 10.0  $\mu$ M tunicamycin (Tunic), or IFN $\gamma$  + 25.0 nM thapsigargin  
847 (Thaps). These genes are a subset associated with gene ontology term GO:0034976,  
848 response to endoplasmic reticulum stress. **(B)** Histograms displaying TPM of *Ddit3*  
849 (DNA-damage inducible transcript 3, aka CHOP), *Atf3* (activating transcription factor 3),  
850 and *Asns* (asparagine synthetase) measured by RNAseq recovered from  $1.0 \times 10^6$   
851 BMMs/condition stimulated for 18 hours with 100 ng/ml Pam3CSK4 (Pam) alone or in  
852 combination with 6.0 ng/ml IFN $\gamma$ , IFN $\gamma$  + 2.0 mM 2DG, or IFN $\gamma$  + 2.0 mM 2DG + 0.1  $\mu$ M  
853 ISRIB. These genes are associated with PERK/ATF4-dependent gene expression (49).

854

855 **Supplementary Figure 4. *Nos2* and *Acod1* transcription segregates with**  
856 **conditions permissive and restrictive for *L. pneumophila* replication in BMMs. (A**  
857 **and B) Histograms displaying transcripts per million (TPM) of *Nos2*, *Acod1*, *Irgm1*,**  
858 ***Irgm3*, *Cybb*, and *Casp11* measured by RNAseq recovered from  $1.0 \times 10^6$**   
859 **BMMs/condition stimulated for 18 hours with 100 ng/ml Pam3CSK4 (Pam) alone or in**  
860 **combination with 6.0 ng/ml IFN $\gamma$ , IFN $\gamma$  + 2.0 mM 2DG, IFN $\gamma$  + 2.0  $\mu$ M geldanamycin**  
861 **(Geld), IFN $\gamma$  + 1.0  $\mu$ g/ml brefeldin A (BfA), IFN $\gamma$  + 2.0 mM dithiothreitol (DTT), IFN $\gamma$  +**  
862 **10.0  $\mu$ M tunicamycin (Tunic), IFN $\gamma$  + 25.0 nM thapsigargin (Thaps).**

863

864 **Supplementary Figure 5. Validation of CRISPR-mediated targeting of *Acod1* in**  
865 **iCas9 BMMs. Western blot demonstrating loss of IRG1 protein expression in**



866 iCas9::*Acod1* BMMs when stimulated for 24 hours with either 100 ng/ml *E. coli*  
867 lipopolysaccharide (LPS) or 100 ng/ml Pam3CSK4 + 10.0 ng/ml IFN $\gamma$ . IRG1 migrates at  
868 ~53 kDa; the IRG1 antibody also stains a non-specific band at a slightly higher  
869 molecular weight. A separate antibody was used to stain for mouse  $\beta$  actin, which  
870 migrates at ~42 kDa.

Figure 1.

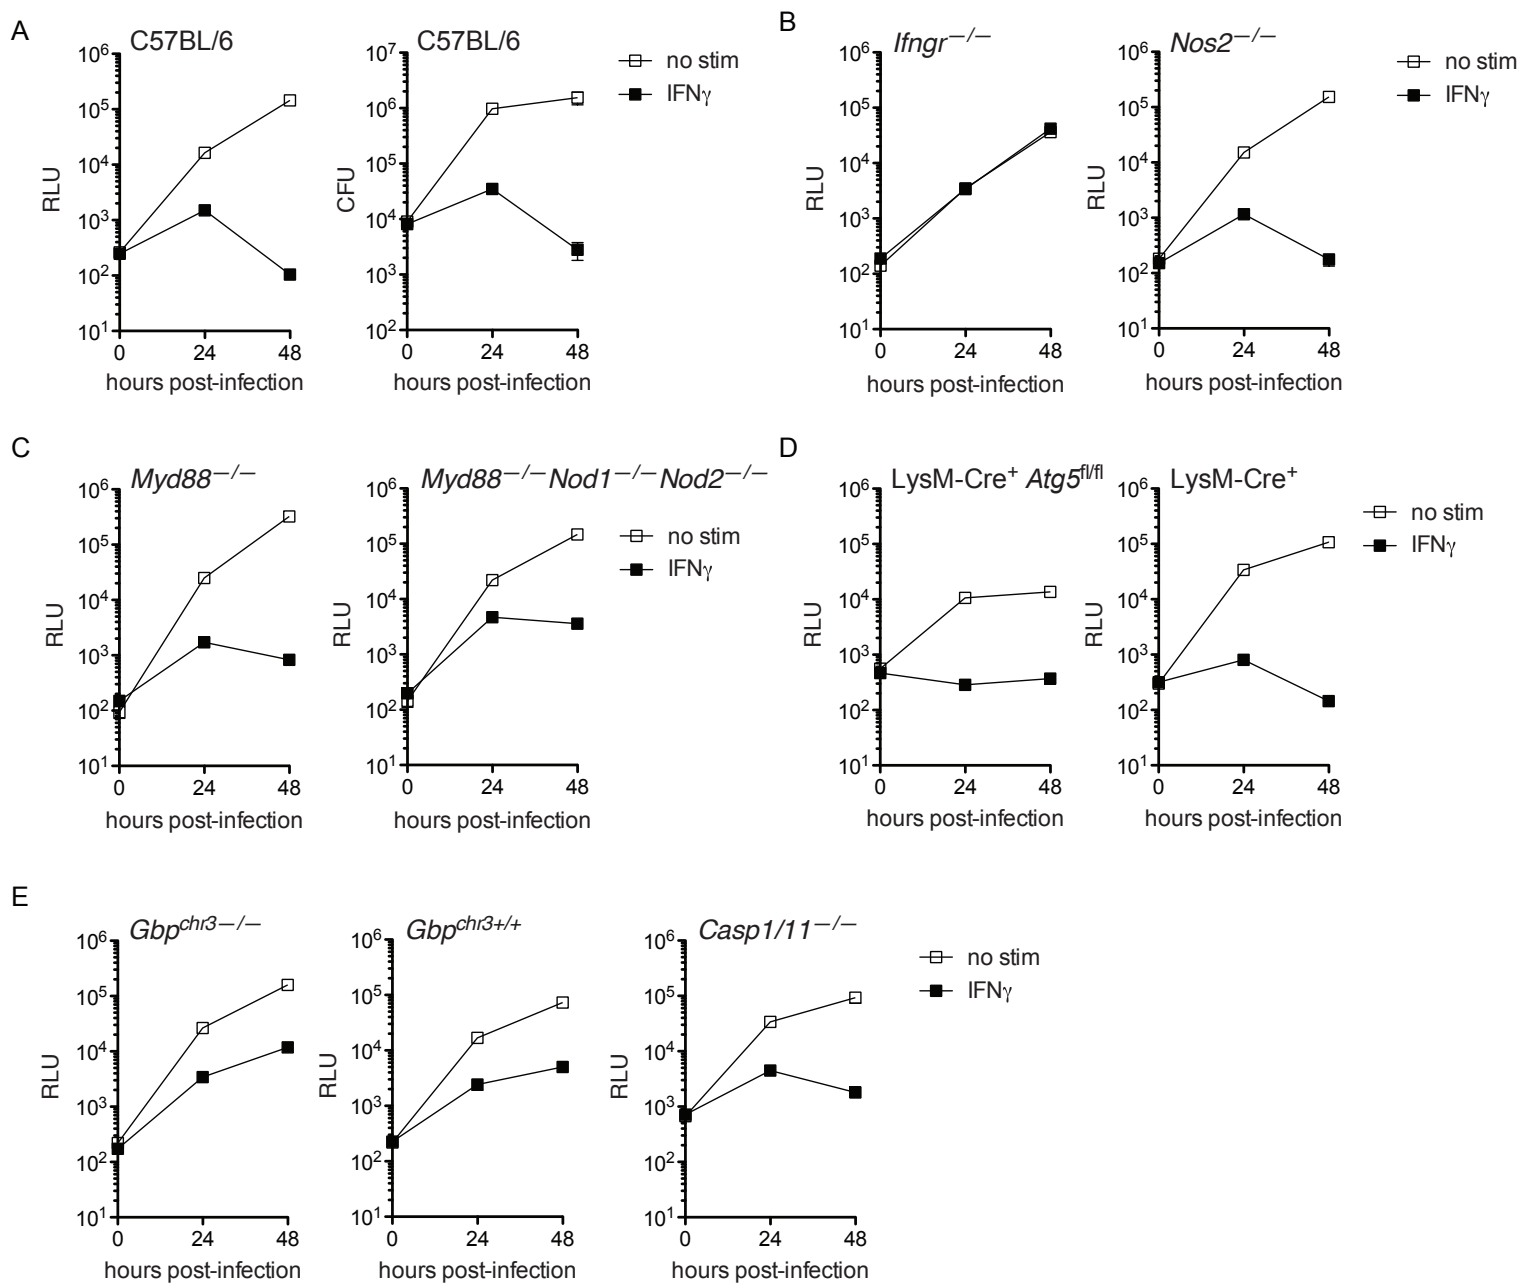

Figure 2.

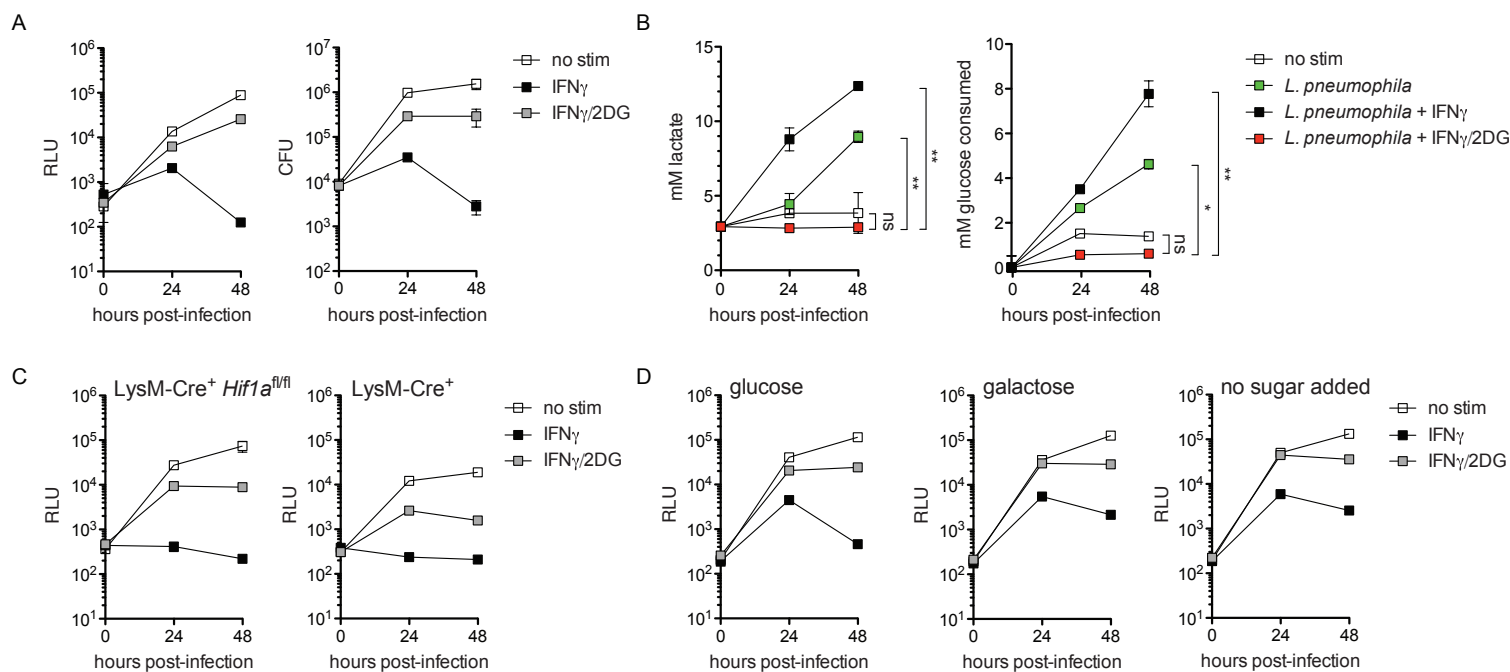

Figure 3.

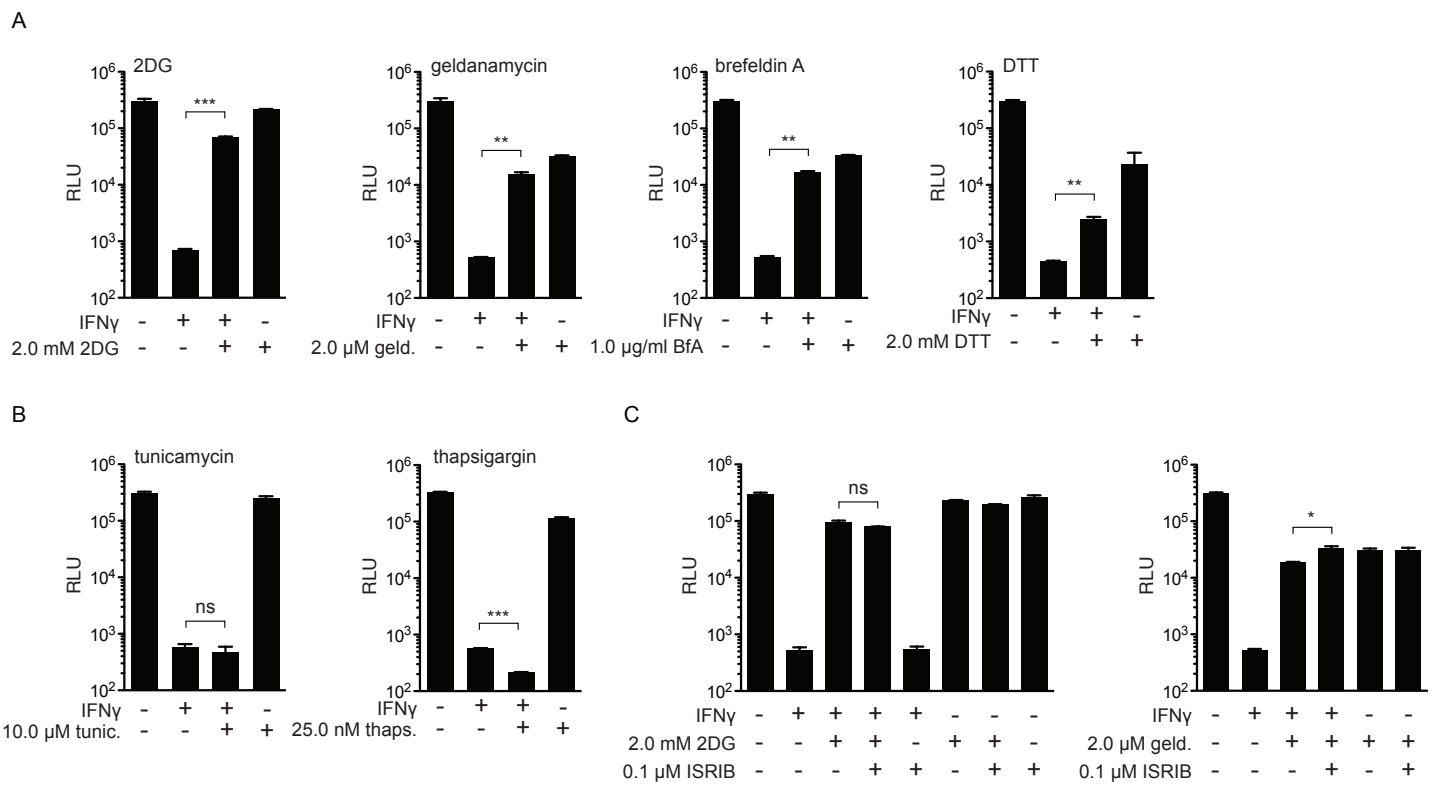

Figure 4.

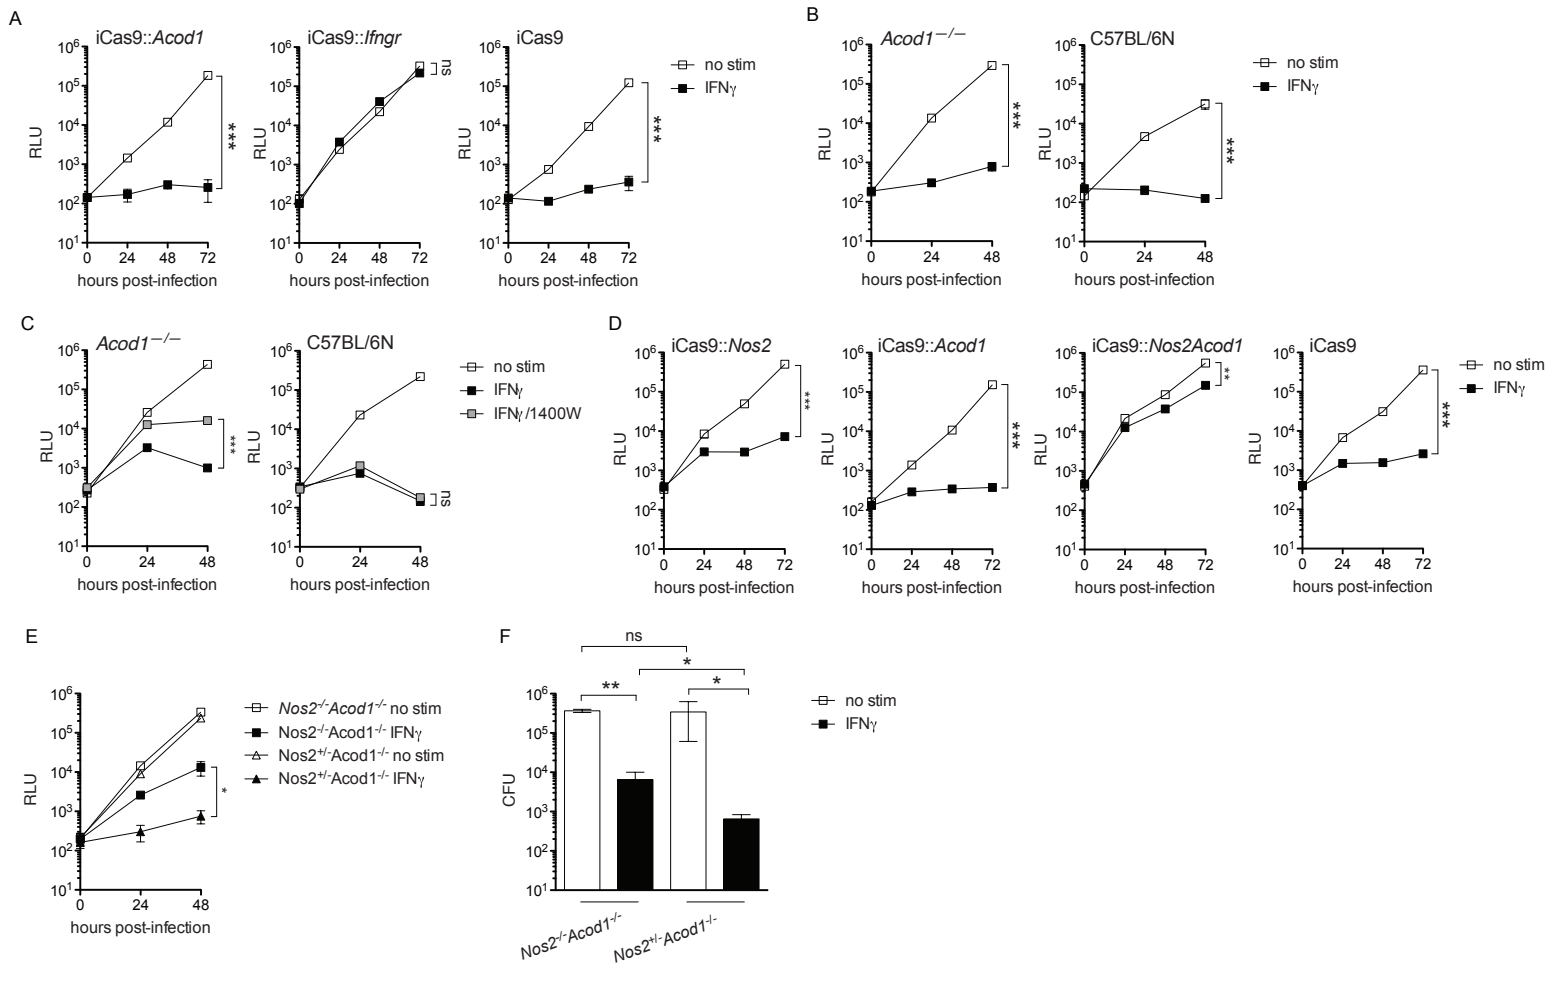

Figure 5.

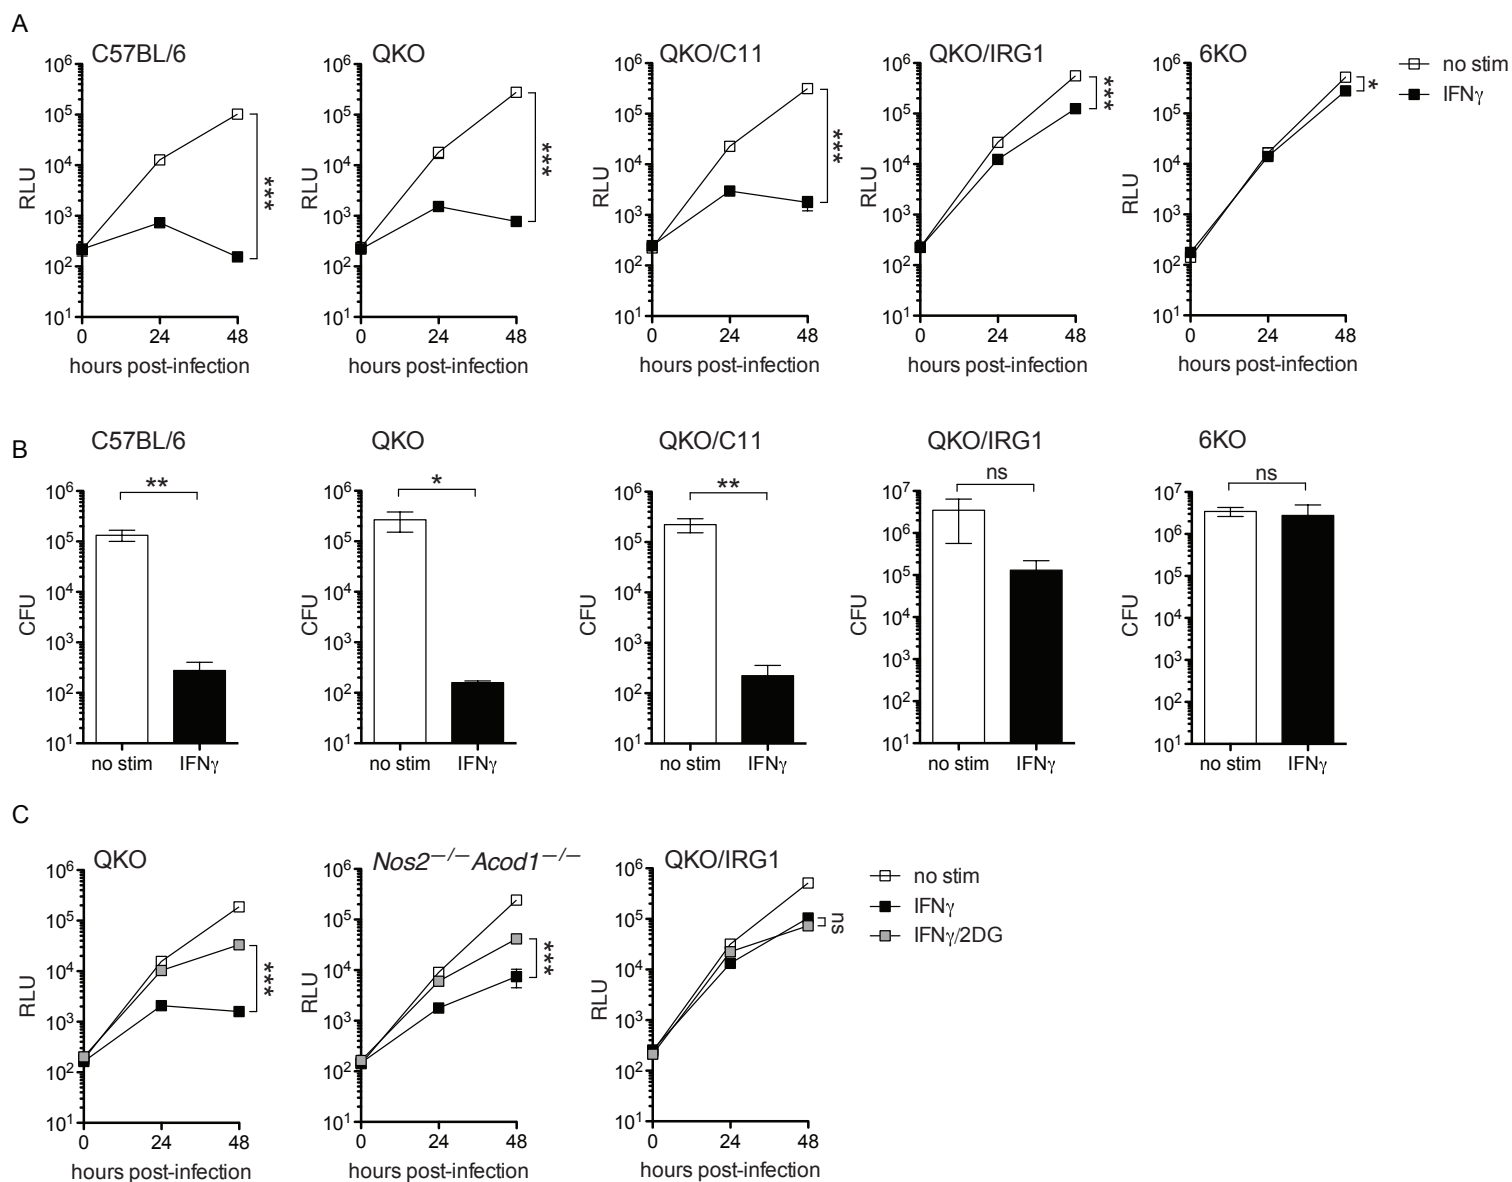

Table 1. Guide RNAs used in this study

CRISPR in iCas9 BMMs (requires gRNA sequence prepended with "G")

| <b>Guide RNA (gRNA) target:</b> | <b>gRNA sequence:</b> | <b>PAM:</b> | <b>Contributing to genotype(s):</b>             |
|---------------------------------|-----------------------|-------------|-------------------------------------------------|
| <i>lfng</i>                     | GGTATTCCCAGCATACGACA  | GGG         | iCas9:: <i>lfng</i>                             |
| <i>Acod1</i> exon 2             | GGACAGATGGTATCATTCCG  | AGG         | iCas9:: <i>Acod1</i> ; iCas9:: <i>Nos2Acod1</i> |
| <i>Acod1</i> exon 3             | GAAAAGCAGCATATGTCGGT  | GGG         | iCas9:: <i>Acod1</i> ; iCas9:: <i>Nos2Acod1</i> |
| <i>Nos2</i> exon 2              | GTCTTTCAGGTCACCTTTGGT | AGG         | iCas9:: <i>Nos2</i> ; iCas9:: <i>Nos2Acod1</i>  |
| <i>Nos2</i> intron 2-3          | GTCAGTAGTGACGTCCTGAT  | TGG         | iCas9:: <i>Nos2</i> ; iCas9:: <i>Nos2Acod1</i>  |

CRISPR in QKO mouse embryos

| <b>Guide RNA (gRNA) target:</b> | <b>gRNA sequence:</b> | <b>PAM:</b> | <b>Contributing to genotype(s):</b> |
|---------------------------------|-----------------------|-------------|-------------------------------------|
| <i>Acod1</i> exon 2             | TGACAGATGGTATCATTCCG  | AGG         | QKO/IRG1; 6KO                       |
| <i>Acod1</i> exon 3             | CAAAAGCAGCATATGTCGGT  | GGG         | QKO/IRG1; 6KO                       |
| Caspase11 exon 5                | GTATCATACTGTAGCACATC  | TGG         | QKO/C11; 6KO                        |
| Caspase11 intron 4-5            | ATGTTGATTTTACCGAAATG  | AGG         | QKO/C11; 6KO                        |

## Supplementary Figure 1.

A

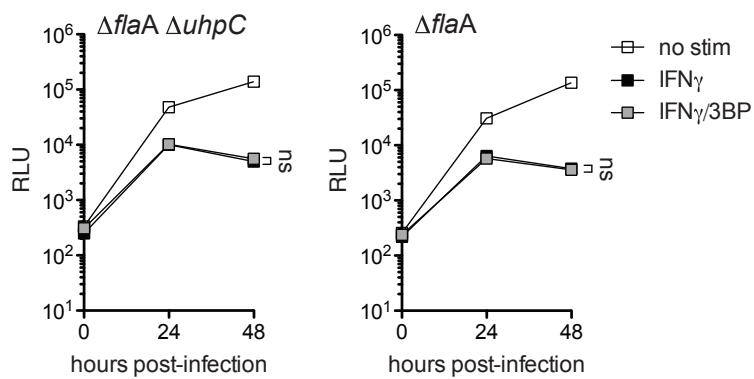

B

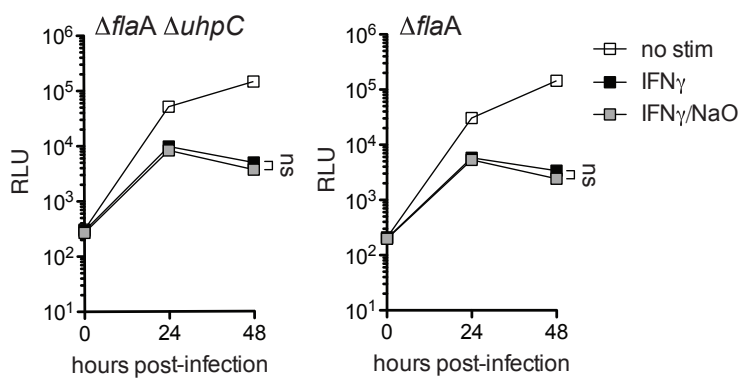



## Supplementary Fig. 2

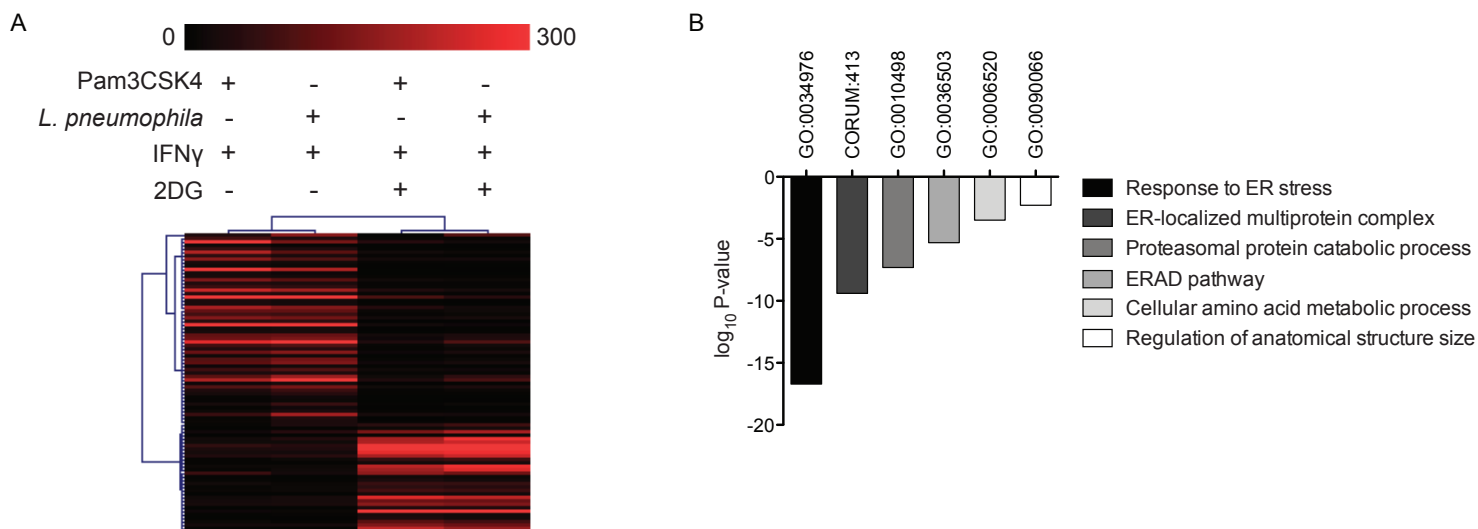

## Supplementary Fig. 3

A

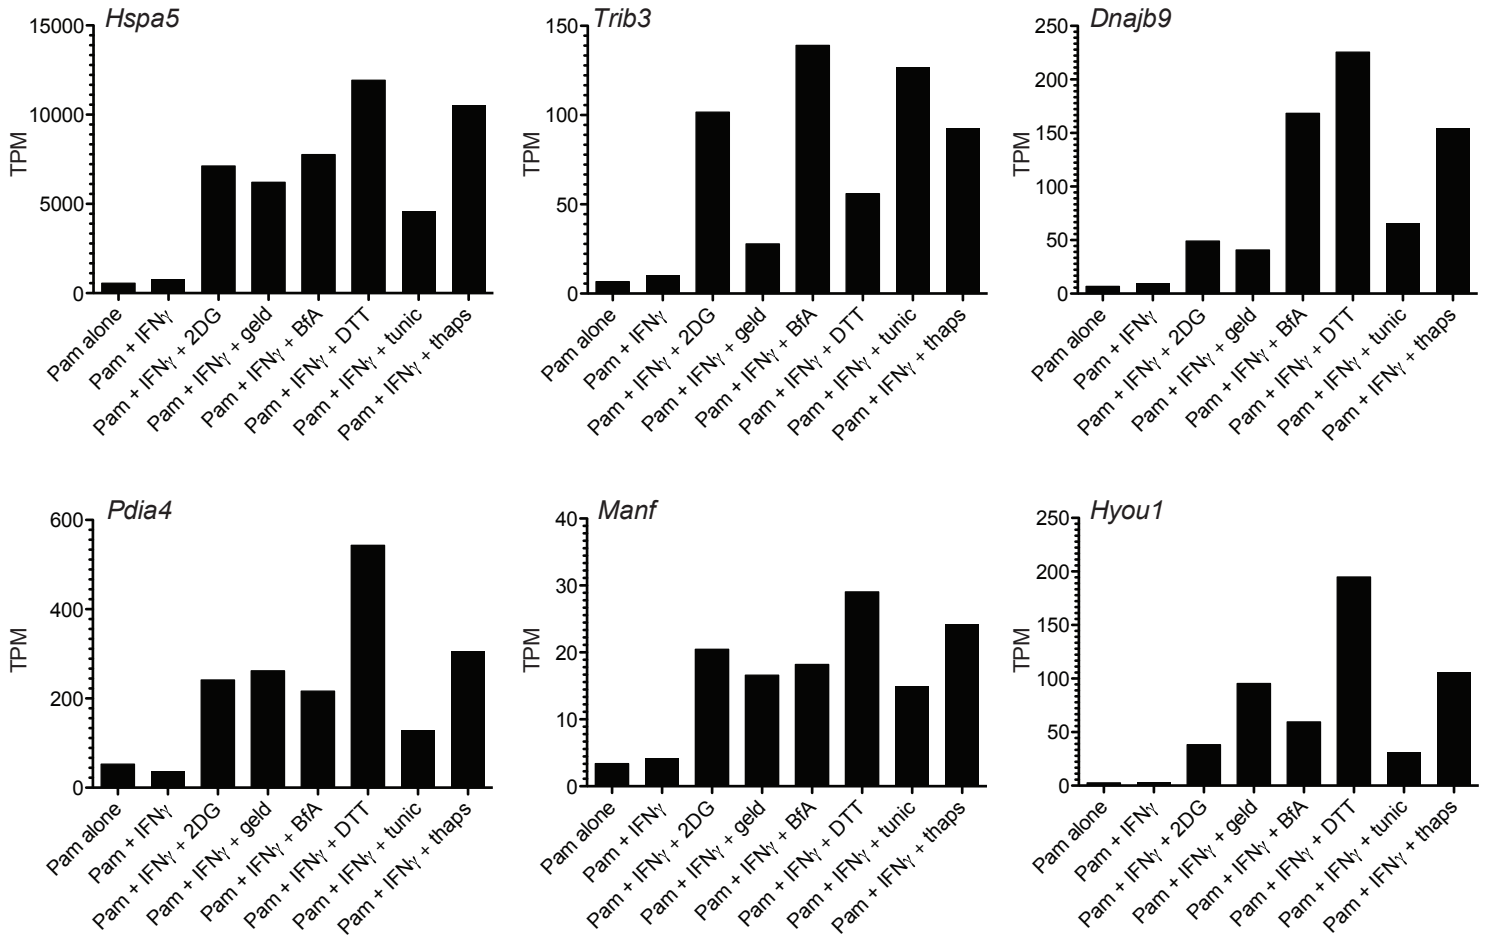

B

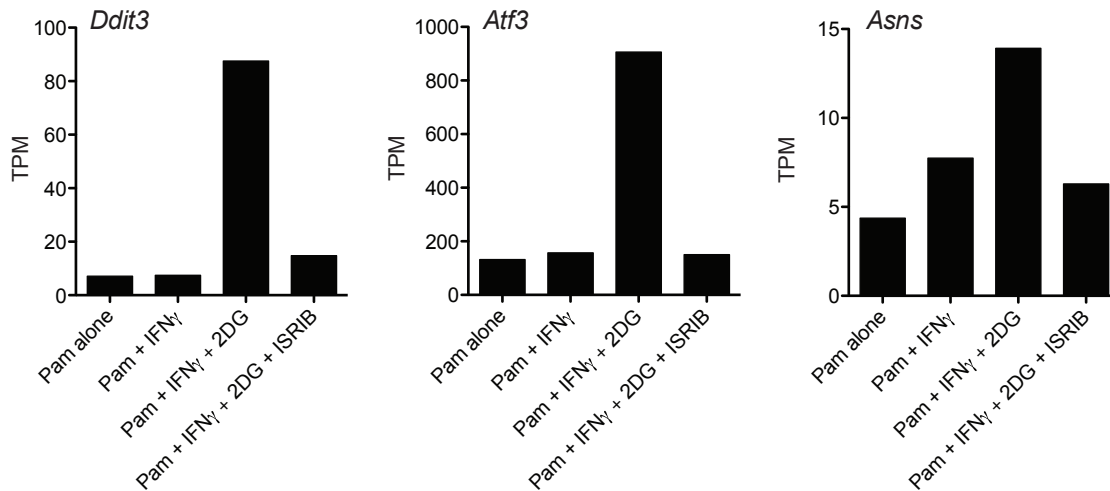

## Supplementary Fig. 4

A

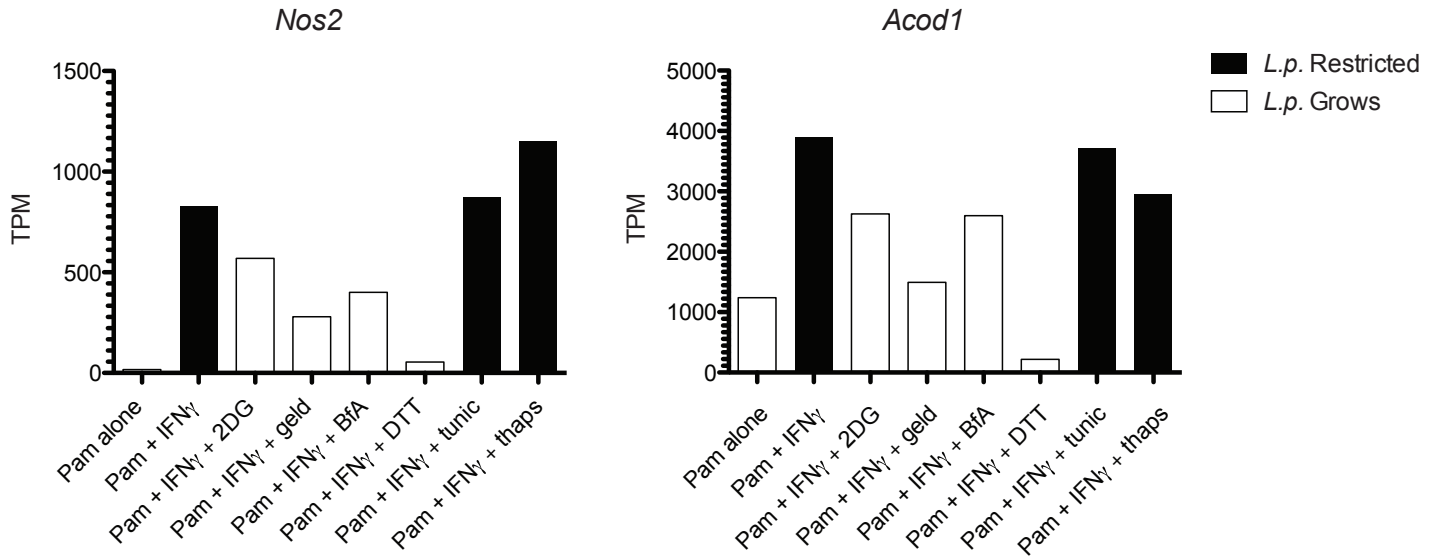

B

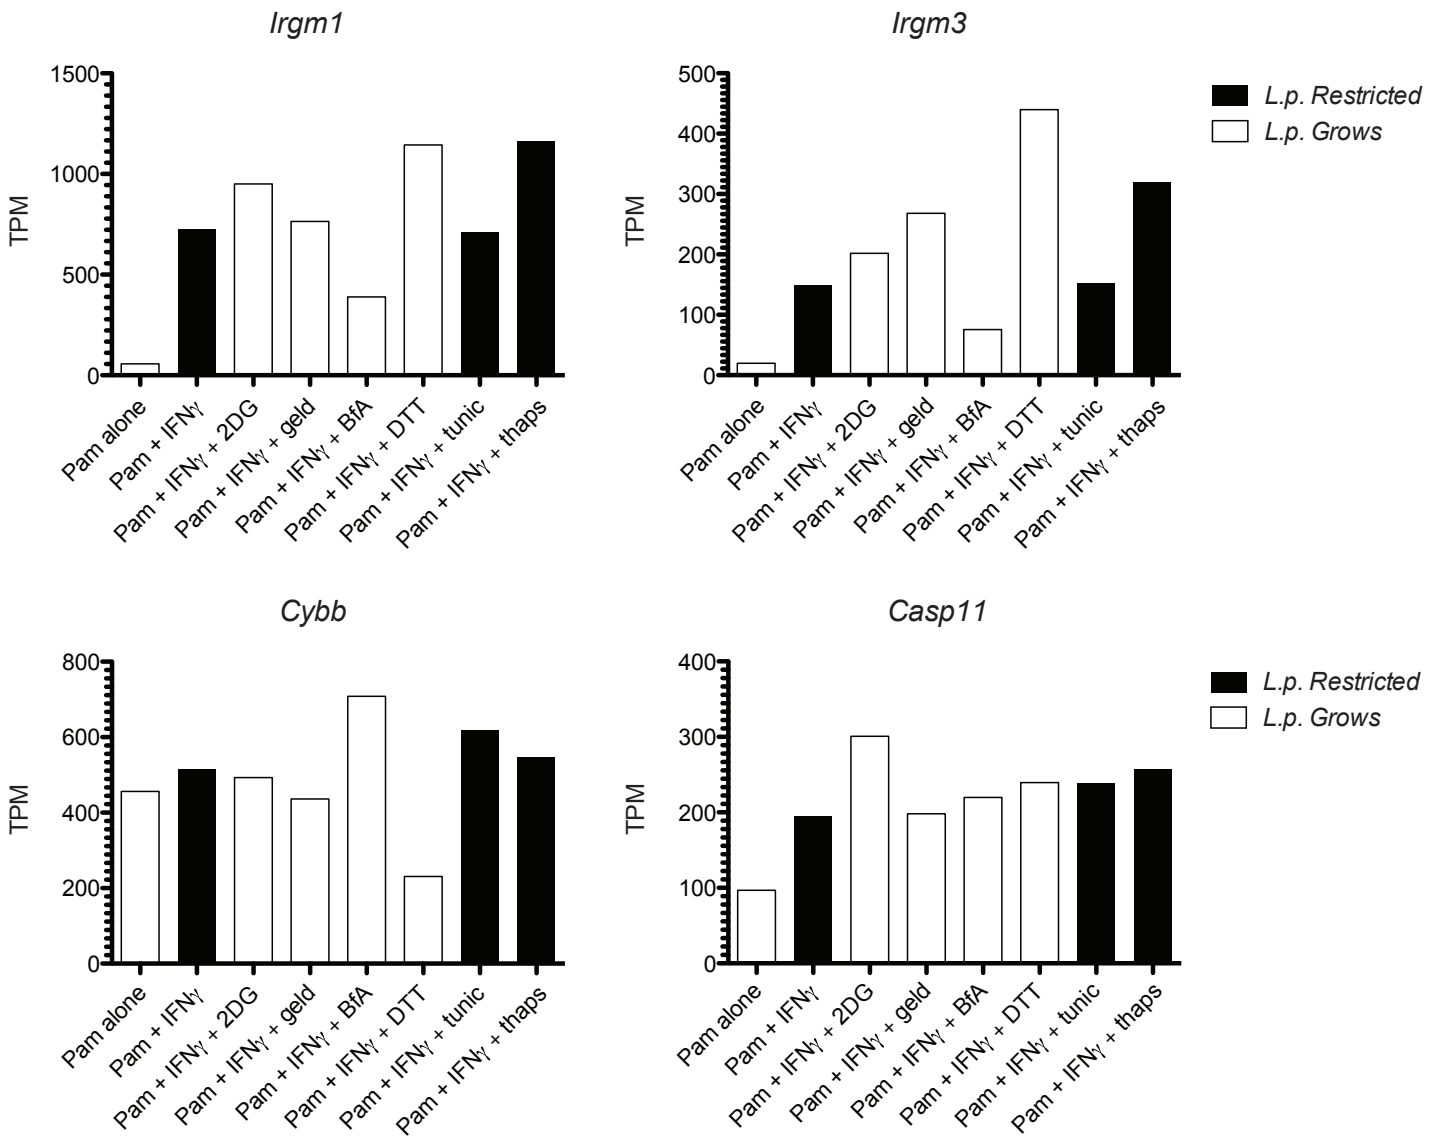

## Supplementary Figure 5.

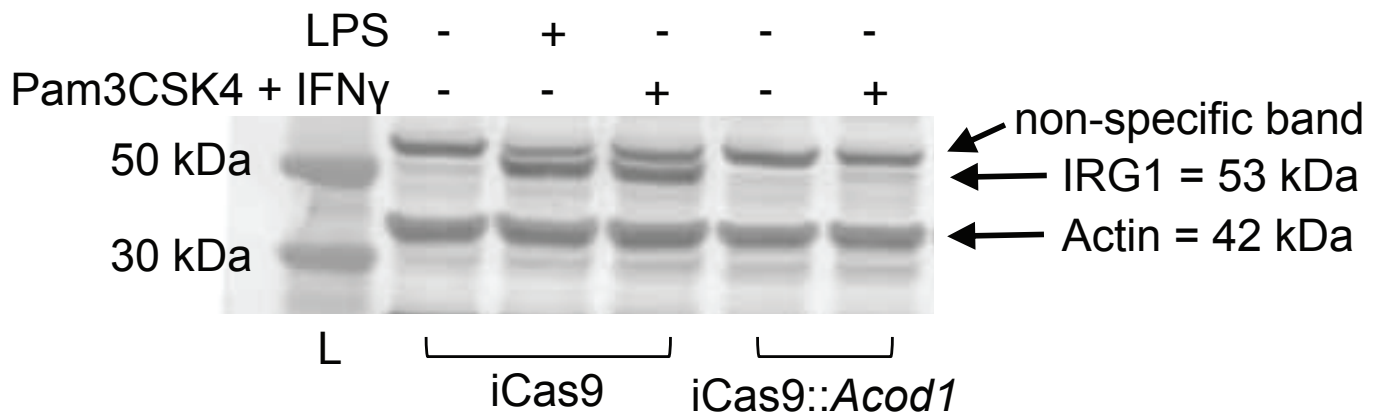

Supplementary Table 1. Transcripts that vary significantly in BMMs treated with Pam3CSK4 + IFN $\gamma$  vs. Pam3CSK4 + IFN $\gamma$  + 2DG

| Location                  | PAM+IFN $\gamma$ FPKM | L.p. +IFN $\gamma$ FPKM | PAM+IFN $\gamma$ +2DG FPKM | L.p. +IFN $\gamma$ +2DG FPKM | log2 fold change PAM | log2 fold change L.p. | Gene                  |
|---------------------------|-----------------------|-------------------------|----------------------------|------------------------------|----------------------|-----------------------|-----------------------|
| chr3:121723536-121735052  | 8.64                  | 40.80                   | 0.00                       | 5.34                         | #DIV/0!              | 2.93                  | F3                    |
| chr10:24914852-24927760   | 330.60                | 207.90                  | 2.82                       | 1.73                         | 6.87                 | 6.91                  | Arg1                  |
| chr10:99263230-99267489   | 51.60                 | 57.56                   | 1.67                       | 2.19                         | 4.95                 | 4.72                  | Dusp6                 |
| chr11:9117979-9136170     | 378.41                | 400.15                  | 22.16                      | 16.15                        | 4.09                 | 4.63                  | Upp1                  |
| chr8:65618039-66473349    | 65.13                 | 33.38                   | 4.18                       | 4.00                         | 3.96                 | 3.06                  | March1                |
| chr12:119158487-119238276 | 19.50                 | 12.96                   | 1.64                       | 2.44                         | 3.57                 | 2.41                  | Itgb8                 |
| chr13:60895350-60897447   | 98.59                 | 132.14                  | 9.22                       | 13.67                        | 3.42                 | 3.27                  | Ctla2b                |
| chr2:128698860-128803160  | 22.88                 | 25.86                   | 2.16                       | 3.90                         | 3.40                 | 2.73                  | Mertk                 |
| chr13:117220572-117274415 | 81.92                 | 73.16                   | 7.79                       | 12.61                        | 3.39                 | 2.54                  | Emb                   |
| chr5:43868826-43912389    | 208.64                | 107.66                  | 20.31                      | 14.14                        | 3.36                 | 2.93                  | Cd38                  |
| chr14:60634728-60764556   | 26.37                 | 27.59                   | 2.65                       | 5.08                         | 3.32                 | 2.44                  | Spata13               |
| chr9:124102182-124109140  | 15.99                 | 25.65                   | 1.63                       | 4.28                         | 3.29                 | 2.58                  | Ccr2                  |
| chr16:10782304-10785536   | 115.02                | 113.26                  | 12.45                      | 18.68                        | 3.21                 | 2.60                  | Socs1                 |
| chr7:43526933-43533175    | 30.95                 | 22.50                   | 3.38                       | 1.66                         | 3.20                 | 3.76                  | Cd33                  |
| chr12:32173396-32208649   | 25.18                 | 16.27                   | 3.00                       | 2.38                         | 3.07                 | 2.77                  | Pik3cg                |
| chr4:132732965-132757171  | 147.14                | 106.91                  | 17.72                      | 14.48                        | 3.05                 | 2.88                  | Smpd3b                |
| chr5:123863569-123865516  | 79.28                 | 95.76                   | 9.69                       | 20.41                        | 3.03                 | 2.23                  | Niacr1                |
| chr10:56377299-56390419   | 76.79                 | 35.79                   | 9.43                       | 5.28                         | 3.03                 | 2.76                  | Gja1                  |
| chr13:43785106-43803132   | 37.04                 | 157.83                  | 4.70                       | 98.43                        | 2.98                 | 0.68                  | Cd83                  |
| chr6:29272487-29276390    | 127.10                | 143.20                  | 16.23                      | 38.78                        | 2.97                 | 1.88                  | Hilpda                |
| chr19:40659646-40742515   | 39.22                 | 47.47                   | 5.09                       | 11.21                        | 2.94                 | 2.08                  | Entpd1                |
| chr10:10335702-10472314   | 55.22                 | 30.34                   | 7.18                       | 4.46                         | 2.94                 | 2.77                  | Adgb                  |
| chr11:62248983-62266580   | 123.70                | 155.86                  | 16.22                      | 29.61                        | 2.93                 | 2.40                  | Adora2b               |
| chr5:43818892-43843468    | 71.44                 | 57.94                   | 9.40                       | 9.24                         | 2.93                 | 2.65                  | Bst1                  |
| chr9:7272513-7283333      | 352.87                | 137.78                  | 47.51                      | 22.29                        | 2.89                 | 2.63                  | Mmp13                 |
| chr11:117965741-117969830 | 262.49                | 306.84                  | 35.50                      | 94.93                        | 2.89                 | 1.69                  | Socs3                 |
| chr6:123227866-123247024  | 151.03                | 133.87                  | 21.24                      | 26.78                        | 2.83                 | 2.32                  | Clec4n                |
| chr7:3485746-3502752      | 159.87                | 96.29                   | 23.43                      | 23.92                        | 2.77                 | 2.01                  | Tarm1                 |
| chr13:97241104-97253040   | 17.85                 | 23.35                   | 2.74                       | 5.14                         | 2.71                 | 2.18                  | Enc1                  |
| chr11:83116844-83122659   | 109.82                | 148.71                  | 17.36                      | 26.50                        | 2.66                 | 2.49                  | Sifn1                 |
| chr17:17887823-17893952   | 569.21                | 405.70                  | 90.54                      | 49.52                        | 2.65                 | 3.03                  | Fpr2                  |
| chr17:17875768-17883951   | 233.86                | 190.30                  | 38.79                      | 25.60                        | 2.59                 | 2.89                  | Fpr1                  |
| chr12:31958478-32061279   | 31.62                 | 24.11                   | 5.41                       | 3.49                         | 2.55                 | 2.79                  | Prkar2b               |
| chr12:85473900-85477478   | 109.40                | 181.78                  | 19.23                      | 57.55                        | 2.51                 | 1.66                  | Fos                   |
| chr2:117279992-117342877  | 28.14                 | 21.39                   | 5.01                       | 5.37                         | 2.49                 | 1.99                  | Rasgrp1               |
| chr18:60393061-60443899   | 38.13                 | 72.99                   | 6.80                       | 12.16                        | 2.49                 | 2.59                  | EMBL-EBI AK149718.1   |
| chr15:74979722-75048837   | 203.51                | 318.72                  | 37.53                      | 87.21                        | 2.44                 | 1.87                  | Ly6a                  |
| chr9:118606708-118901003  | 18.55                 | 6.20                    | 3.48                       | 2.30                         | 2.42                 | 1.43                  | Itga9                 |
| chr2:164948238-164955846  | 40.93                 | 31.23                   | 7.80                       | 7.27                         | 2.39                 | 2.10                  | Mmp9                  |
| chr16:75858793-75909273   | 96.32                 | 139.27                  | 18.98                      | 32.44                        | 2.34                 | 2.10                  | Samsn1                |
| chr7:38183216-38197565    | 26.84                 | 48.18                   | 5.34                       | 5.68                         | 2.33                 | 3.09                  | RIKEN cDNA 1600014C10 |
| chr4:132781761-132796364  | 112.02                | 119.12                  | 22.44                      | 31.54                        | 2.32                 | 1.92                  | Themis2               |
| chr19:21778341-21858450   | 48.39                 | 42.18                   | 9.98                       | 6.90                         | 2.28                 | 2.61                  | Cemip2                |
| chr9:41012959-41157668    | 29.20                 | 18.98                   | 6.47                       | 6.32                         | 2.17                 | 1.59                  | Ubash3b               |
| chr5:137787801-137858049  | 197.74                | 153.77                  | 44.00                      | 22.16                        | 2.17                 | 2.79                  | Zcwpw1                |
| chr12:80107759-80113013   | 16.27                 | 22.12                   | 3.87                       | 2.84                         | 2.07                 | 2.96                  | Zfp361f               |
| chr8:92855349-92919279    | 75.81                 | 97.27                   | 18.55                      | 17.46                        | 2.03                 | 2.48                  | Lpcat2                |
| chr11:48985328-48992246   | 26.32                 | 69.92                   | 6.72                       | 13.40                        | 1.97                 | 2.38                  | Tgtp1                 |
| chr11:44454570-44470548   | 34.39                 | 40.38                   | 9.35                       | 8.33                         | 1.88                 | 2.28                  | Ublcp1                |
| chr7:114415253-114538029  | 9.19                  | 16.69                   | 2.59                       | 2.62                         | 1.83                 | 2.67                  | Pde3b                 |
| chr3:27317076-27339665    | 5.40                  | 16.81                   | 1.74                       | 2.59                         | 1.64                 | 2.70                  | Tnfrsf10              |
| chr17:44096293-44105808   | 8.18                  | 14.92                   | 2.71                       | 2.14                         | 1.60                 | 2.80                  | Enpp4                 |
| chr8:45395664-45410539    | 15.12                 | 33.76                   | 5.17                       | 6.57                         | 1.55                 | 2.36                  | Tlr3                  |
| chr11:83175185-83190251   | 71.33                 | 191.83                  | 26.41                      | 24.21                        | 1.43                 | 2.99                  | Sifn4                 |
| chr19:21391306-21472661   | 11.06                 | 32.62                   | 6.57                       | 6.32                         | 0.75                 | 2.37                  | Gda                   |
| chr6:7675170-7693182      | 73.21                 | 24.00                   | 165.25                     | 132.37                       | -1.17                | -2.46                 | Asns                  |
| chr4:59805649-59904832    | 5.90                  | 2.86                    | 17.84                      | 14.42                        | -1.60                | -2.33                 | Snx30                 |
| chrX:36328408-36366856    | 9.53                  | 4.48                    | 30.18                      | 22.38                        | -1.66                | -2.32                 | Lonrf3                |
| chr3:108424774-108445259  | 20.26                 | 12.28                   | 70.09                      | 65.73                        | -1.79                | -2.42                 | Sars                  |
| chr3:100468062-100489192  | 3.45                  | 3.65                    | 14.71                      | 26.76                        | -2.09                | -2.87                 | Fam46c                |
| chr10:127514938-127522444 | 5.23                  | 4.16                    | 22.87                      | 29.79                        | -2.13                | -2.84                 | Shmt2                 |
| chr16:22857844-22879634   | 39.83                 | 50.36                   | 195.50                     | 234.30                       | -2.30                | -2.22                 | Dnajb11               |
| chr12:116405401-116463531 | 1.97                  | 2.87                    | 9.82                       | 14.79                        | -2.32                | -2.36                 | Ncapp2                |
| chr7:132557474-132576398  | 24.59                 | 26.95                   | 127.96                     | 123.99                       | -2.38                | -2.20                 | Oat                   |
| chr11:114922780-114934386 | 9.25                  | 13.23                   | 53.38                      | 47.90                        | -2.53                | -1.86                 | Cd300lb               |
| chr2:121413901-121438686  | 24.63                 | 23.63                   | 149.03                     | 124.87                       | -2.60                | -2.40                 | Pdia3                 |
| chr12:91805907-91849157   | 26.09                 | 27.07                   | 159.39                     | 150.35                       | -2.61                | -2.47                 | Sei1                  |
| chr7:45522738-45526268    | 8.36                  | 35.02                   | 51.65                      | 77.48                        | -2.63                | -1.15                 | Ppp1r15a              |
| chr14:118937931-118981702 | 12.60                 | 14.45                   | 82.25                      | 73.67                        | -2.71                | -2.35                 | Dnajc3                |
| chr13:95627176-95891922   | 3.81                  | 7.23                    | 27.27                      | 22.09                        | -2.84                | -1.61                 | Iggap2                |
| chr2:152337424-152344060  | 13.31                 | 5.55                    | 106.51                     | 83.01                        | -3.00                | -3.90                 | Trib3                 |
| chr18:65800577-65817657   | 16.65                 | 48.02                   | 140.92                     | 196.46                       | -3.08                | -2.03                 | Sec11c                |
| chr13:110395043-110400843 | 21.74                 | 43.21                   | 195.08                     | 288.27                       | -3.17                | -2.74                 | Pik2                  |
| chr12:17266594-17324730   | 61.82                 | 47.19                   | 606.19                     | 664.54                       | -3.29                | -3.82                 | Pdia6                 |
| chr14:103814624-103844524 | 2.83                  | 2.98                    | 27.82                      | 24.59                        | -3.30                | -3.04                 | Ednrb                 |
| chr9:106887414-106891938  | 19.43                 | 19.31                   | 201.31                     | 236.22                       | -3.37                | -3.61                 | Manf                  |
| chr6:47796140-47813512    | 31.57                 | 35.74                   | 330.67                     | 344.11                       | -3.39                | -3.27                 | Pdia4                 |
| chr9:44379489-44392576    | 24.95                 | 23.65                   | 269.93                     | 281.33                       | -3.44                | -3.57                 | HYOU1                 |
| chr16:92391952-92466146   | 5.64                  | 13.03                   | 63.96                      | 77.68                        | -3.50                | -2.58                 | Rcan1                 |
| chr2:84936608-84958509    | 3.33                  | 2.78                    | 41.74                      | 39.64                        | -3.65                | -3.84                 | Slc43a3               |
| chr12:83987860-83993875   | 2.60                  | 1.65                    | 33.74                      | 23.37                        | -3.70                | -3.83                 | Acou2                 |
| chr12:44205896-44210068   | 17.95                 | 25.83                   | 259.96                     | 223.40                       | -3.86                | -3.11                 | Dnajb9                |
| chr10:127290792-127311786 | 14.13                 | 14.59                   | 217.63                     | 284.18                       | -3.94                | -4.28                 | Ddit3                 |
| chr15:88819645-88826718   | 10.05                 | 18.32                   | 184.55                     | 257.10                       | -4.20                | -3.81                 | Creld2                |
| chr16:17130137-17132383   | 15.35                 | 11.96                   | 331.95                     | 311.42                       | -4.43                | -4.70                 | Sdf21l                |
| chr8:94386499-94395358    | 6.33                  | 3.36                    | 225.67                     | 175.88                       | -5.16                | -5.71                 | Herpud1               |
